# Supplementary material
Source: PubMed Central journal article supplement (PMC6465173)
Supplement: NIHMS994150-supplement-Supp_info1.pdf [file NIHMS994150-supplement-Supp_info1.pdf]

**SUPPLEMENTAL MATERIAL: Model Code, Supplemental Figures and Tables**

**Thorough QT/QTc in a Dish: An In Vitro Human Model That Accurately Predicts Clinical Concentration-QTc Relationships**

Alexander D. Blanchette, BS<sup>1\*</sup>; Fabian A. Grimm, PhD<sup>1\*</sup>; Chimedullam Dalaijamts, PhD<sup>1</sup>; Nan-Hung Hsieh, PhD<sup>1</sup>; Kyle Ferguson, MS<sup>1</sup>; Yu-Syuan Luo, PhD<sup>1</sup>; Ivan Rusyn, MD PhD<sup>1</sup>; Weihsueh A. Chiu, PhD<sup>1</sup>

<sup>1</sup>Department of Veterinary Integrative Biosciences, Texas A&M University, College Station, TX

\* These authors equally contributed to this manuscript

**Address correspondence to:**

Weihsueh A. Chiu, PhD, Department of Veterinary Integrative Biosciences, 4458 TAMU, Texas A&M University, College Station, TX 77843, (979) 845-4106, fax: (979) 847-8981

**Conflict of Interest Statement**

The authors declared no competing interests for this work.

## Bayesian Dose-Response Model (stan version 2.17.3(1))

```
data {
  real scale_factor; // overall scaling factor
  int<lower=0> Ni; // Number of cell lines
  int<lower=0> Nj; // Number of data points
  vector[Nj] x; // concentrations
  vector[Nj] ys; // responses, scaled by scale_factor
  int<lower=0,upper=Ni> cell[Nj]; // cell line for each data point
  int<lower=1> Nquants; // Number of quantiles of EC10 to calculate
  vector[Nquants] quants; // Quantiles (e.g.,
c(0.01,0.025,0.5,0.975,0.99))
}
parameters {
  // Population mean
  real m_y0; // background
  real m_x0; // numerator scale
  real m_Emax; // max effect size
  real m_n; // Hill exponent
  // Population standard deviation
  real<lower=0> sd_y0;
  real<lower=0> sd_x0;
  real<lower=0> sd_Emax;
  real<lower=0> sd_n;
  // Inter-individual variability
  real z_y0[Ni];
  real z_x0[Ni];
  real z_Emax[Ni];
  real z_n[Ni];
  // Residual error variance
  real<lower=0> sigma_y;
}
transformed parameters {
  real y0[Ni]; // untransformed background
  real x0[Ni]; // untransformed numerator scale
  real Emax[Ni]; // untransformed max effect size
  real n[Ni]; // untransformed Hill exponent
  for (i in 1:Ni) { // un-log transform
    y0[i] = exp(m_y0 + sd_y0 * z_y0[i]);
    x0[i] = exp(m_x0 + sd_x0 * z_x0[i]);
    Emax[i] = exp(m_Emax + sd_Emax * z_Emax[i]); // Emax
  }
  positive
  n[i] = exp(m_n + sd_n * z_n[i]);
}
}
model {
```

```

vector[Nj] yp;
// prior distributions
m_y0 ~ normal(0,5);
m_x0 ~ normal(0,5);
m_Emax ~ normal(0,5);
m_n ~ normal(0,1);
sd_y0 ~ normal(0,1);
sd_x0 ~ normal(0,1);
sd_Emax ~ normal(0,1);
sd_n ~ normal(0,0.2);
z_y0 ~ normal(0,1);
z_x0 ~ normal(0,1);
z_Emax ~ normal(0,1);
z_n ~ normal(0,1);
sigma_y ~ normal(0,0.2);
for (j in 1:Nj) {
    yp[j] = y0[cell[j]]*(1 + (x[j] / x0[cell[j]])^n[cell[j]] /
(1 + ((x[j] / x0[cell[j]])^n[cell[j]])/Emax[cell[j]]));
}
ys ~ student_t(5,yp,sigma_y);
}
generated quantities {
    vector[Ni] ec10; // Concentration at which the relative
response is 10%
    for (i in 1:Ni) {
        if (Emax[i] > 0.1)
            ec10[i] = x0[i]*(0.1 * Emax[i] / (Emax[i] -
0.1))^(1/n[i]);
        else
            ec10[i] = 1000;
    }
}

```

## SUPPLEMENTAL FIGURES AND FIGURE LEGENDS

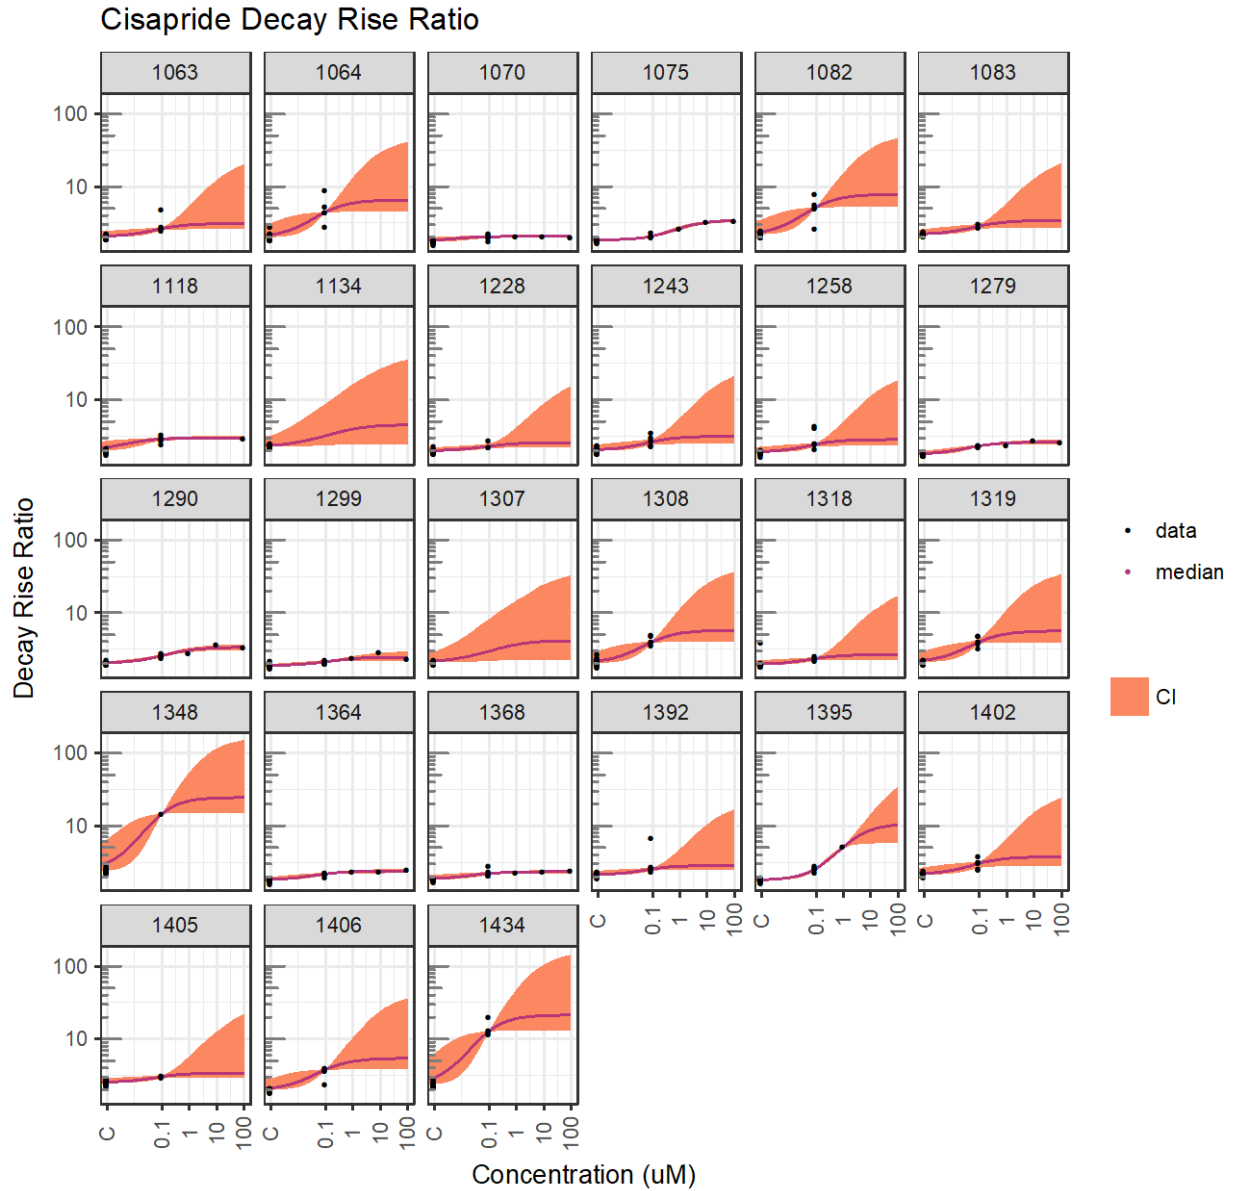

**Figure S1. Concentration-response model fits for cisapride showing decay-rise data (black dots); median prediction (colored lines) and 95% CI (colored shadings). Each panel is a different donor.**

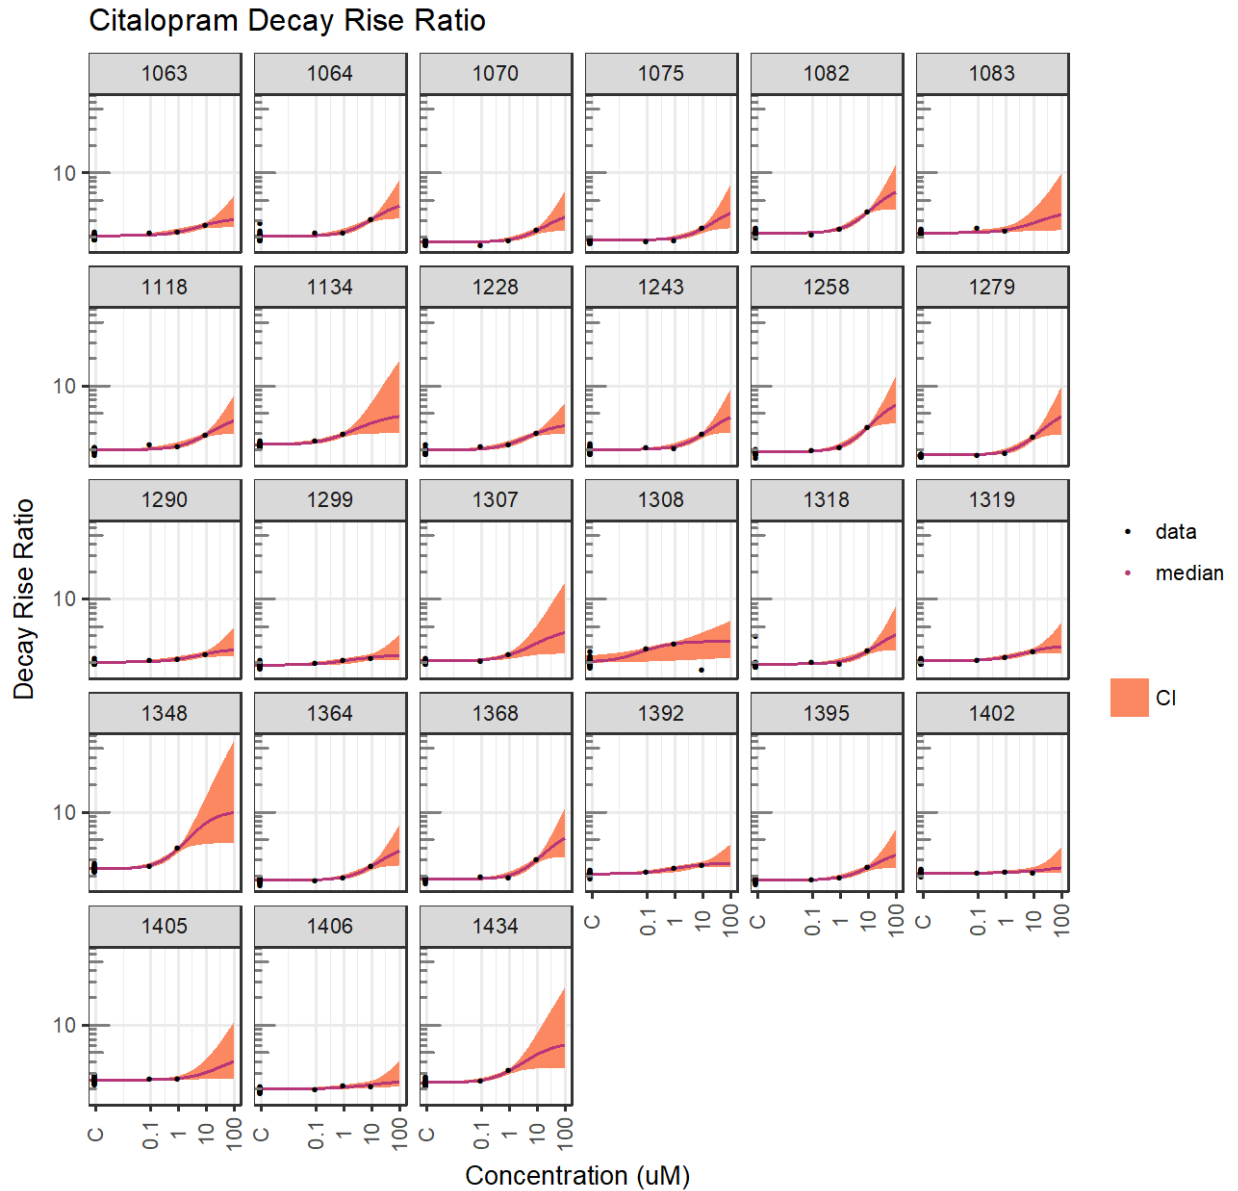

**Figure S2. Concentration-response model fits for citalopram showing decay-rise data (black dots); median prediction (colored lines) and 95% CI (colored shadings). Each panel is a different donor.**

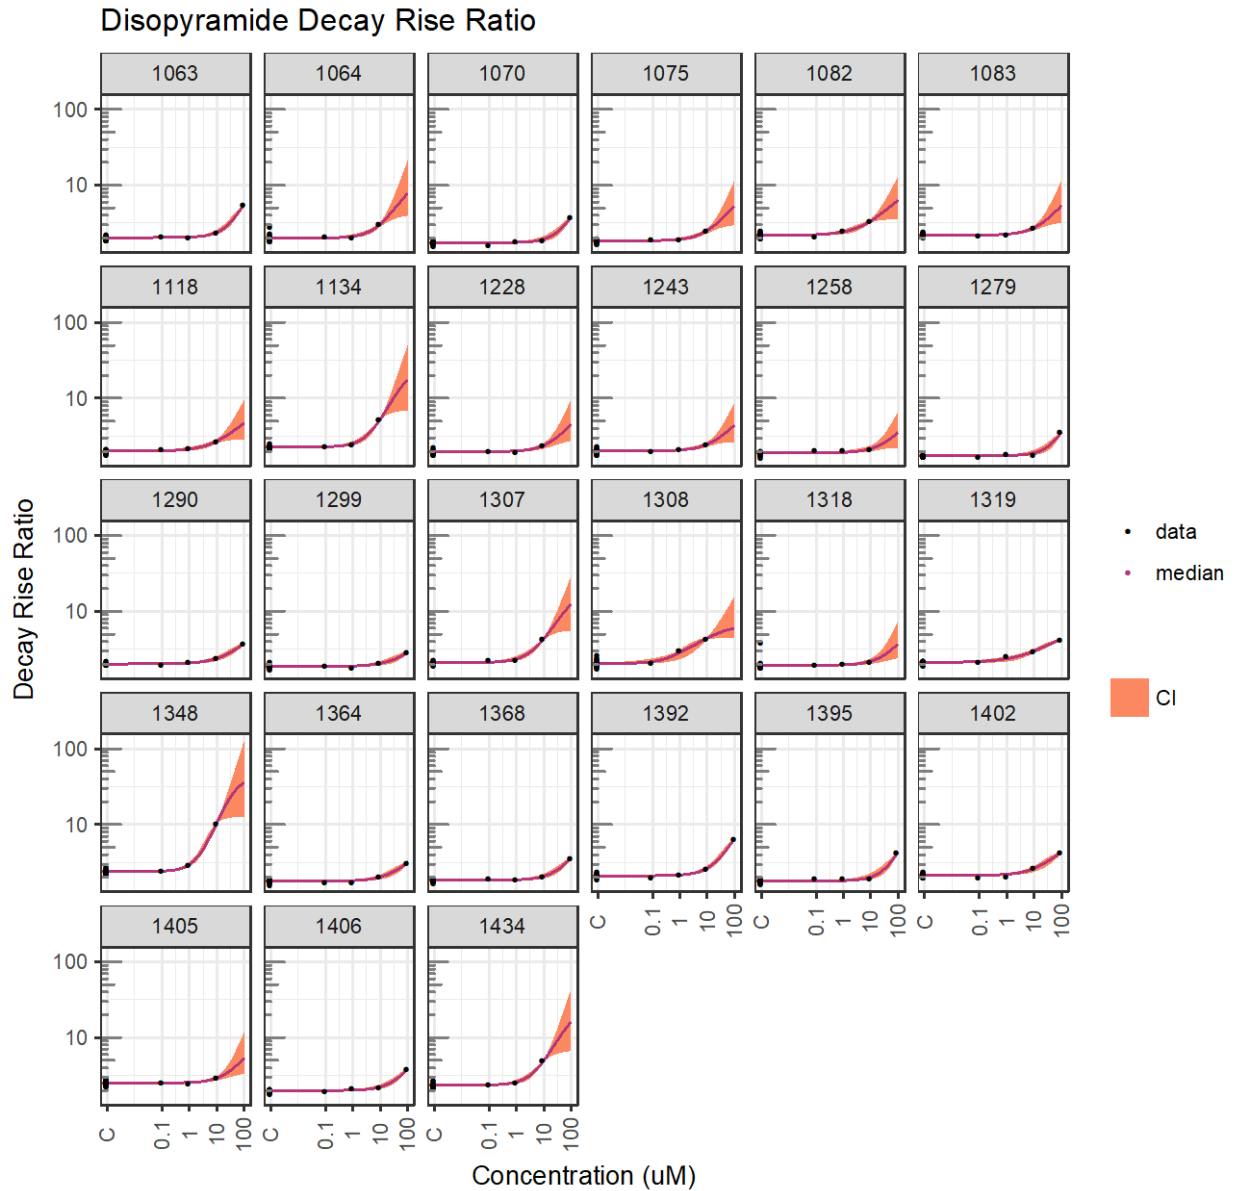

**Figure S3. Concentration-response model fits for disopyramide showing decay-rise data (black dots); median prediction (colored lines) and 95% CI (colored shadings). Each panel is a different donor.**

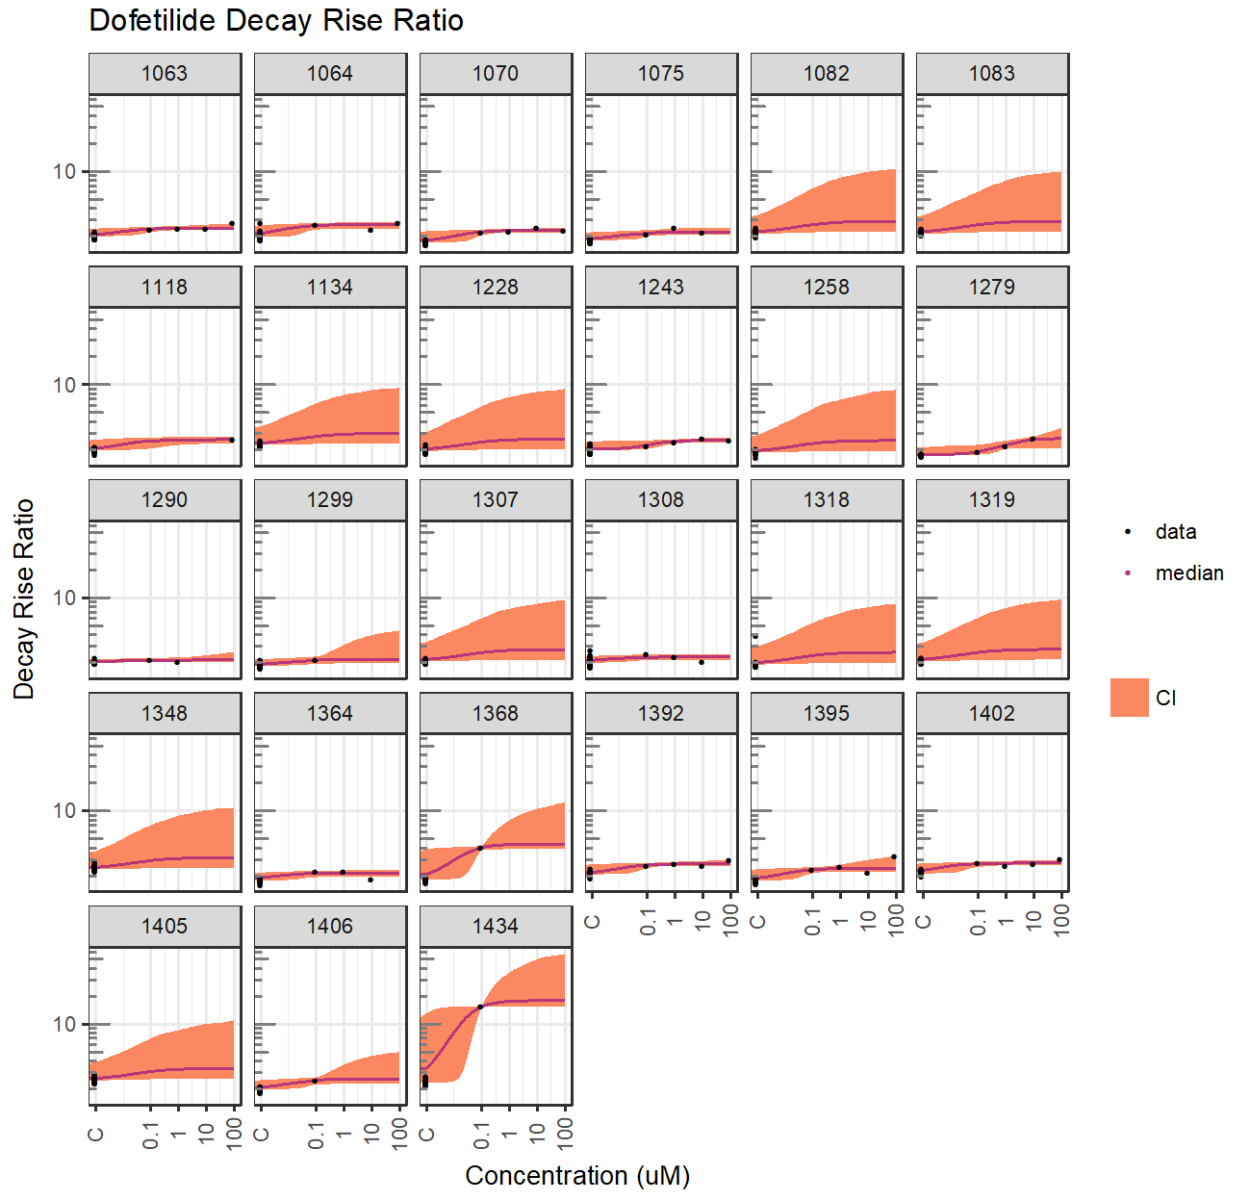

**Figure S4. Concentration-response model fits for dofetilide showing decay-rise data (black dots); median prediction (colored lines) and 95% CI (colored shadings). Each panel is a different donor.**

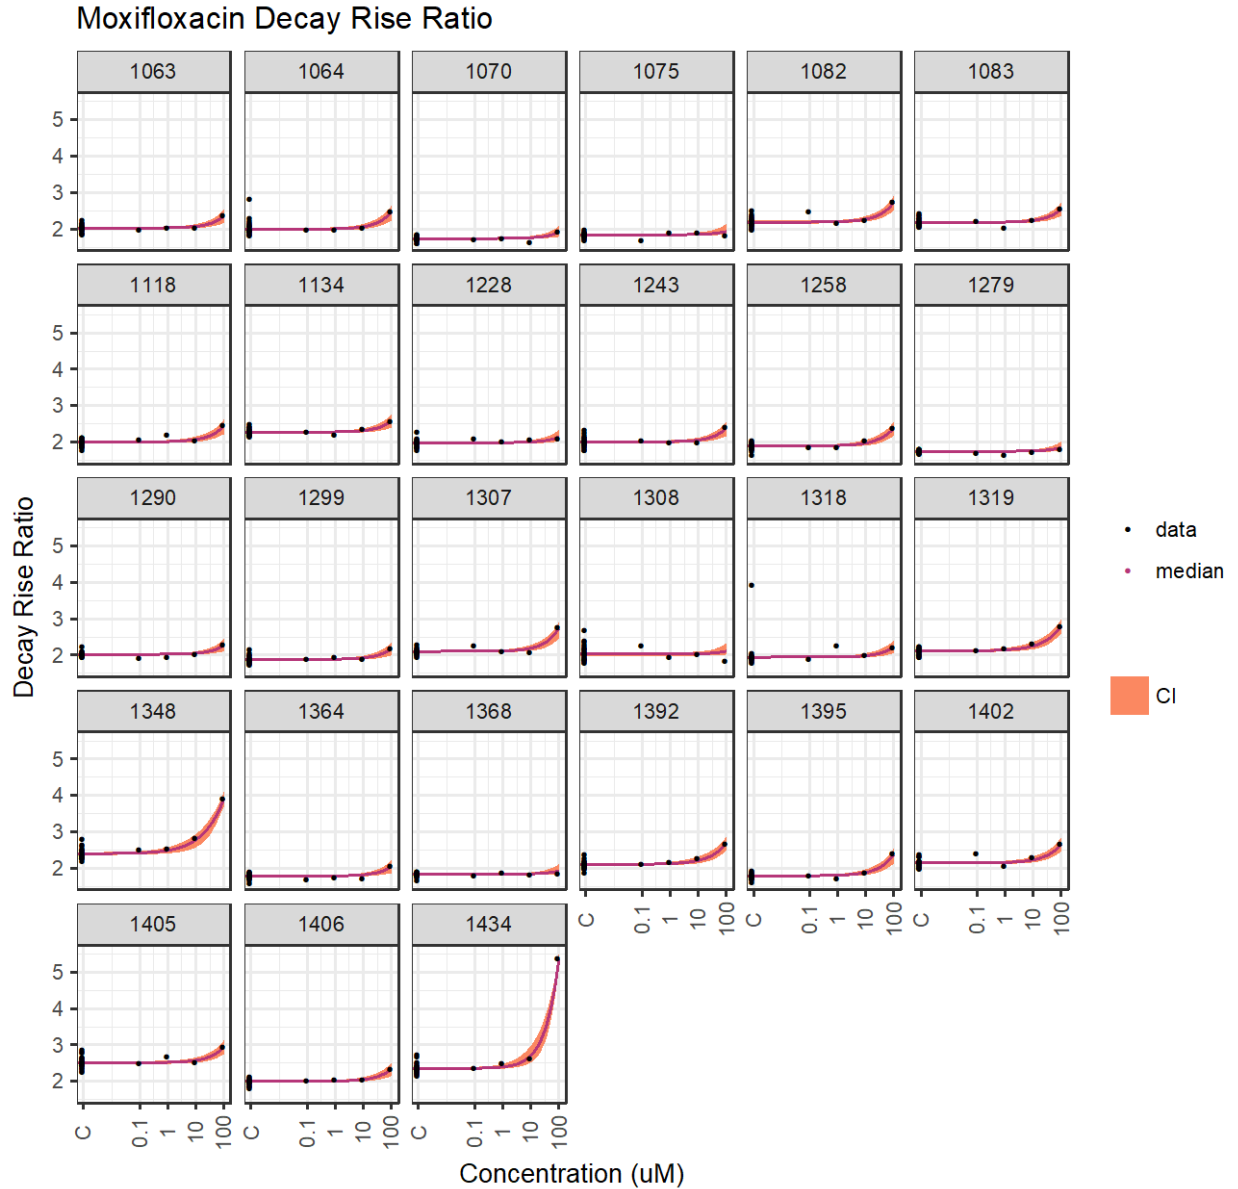

**Figure S5. Concentration-response model fits for moxifloxacin showing decay-rise data (black dots); median prediction (colored lines) and 95% CI (colored shadings). Each panel is a different donor.**



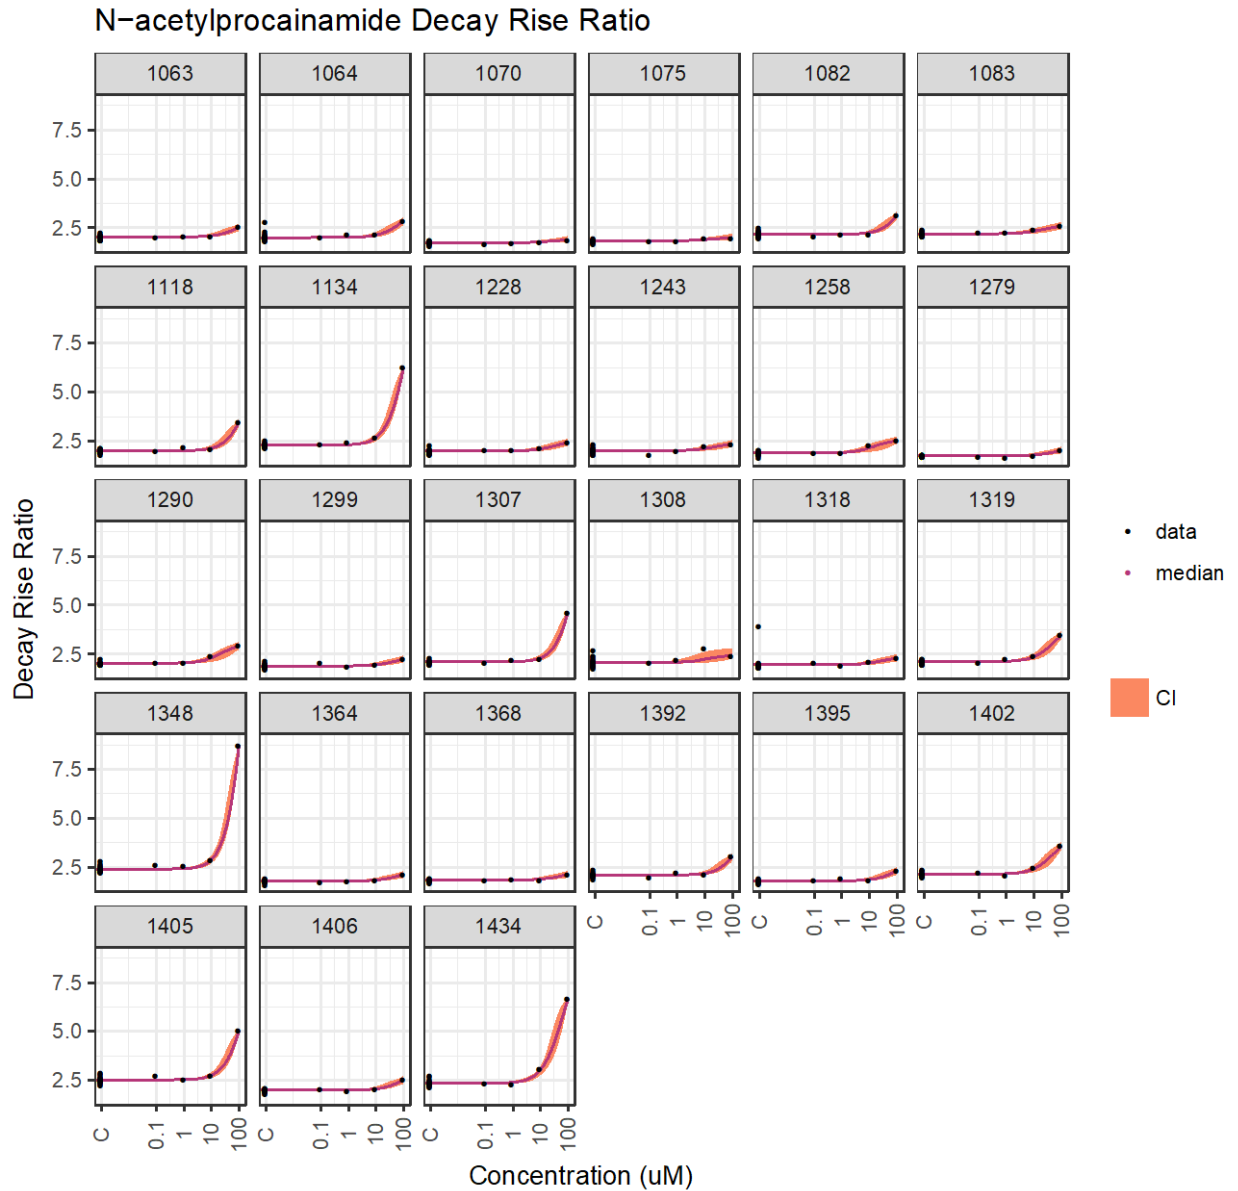

**Figure S6. Concentration-response model fits for N-acetylprocainamide showing decay-rise data (black dots); median prediction (colored lines) and 95% CI (colored shadings). Each panel is a different donor.**

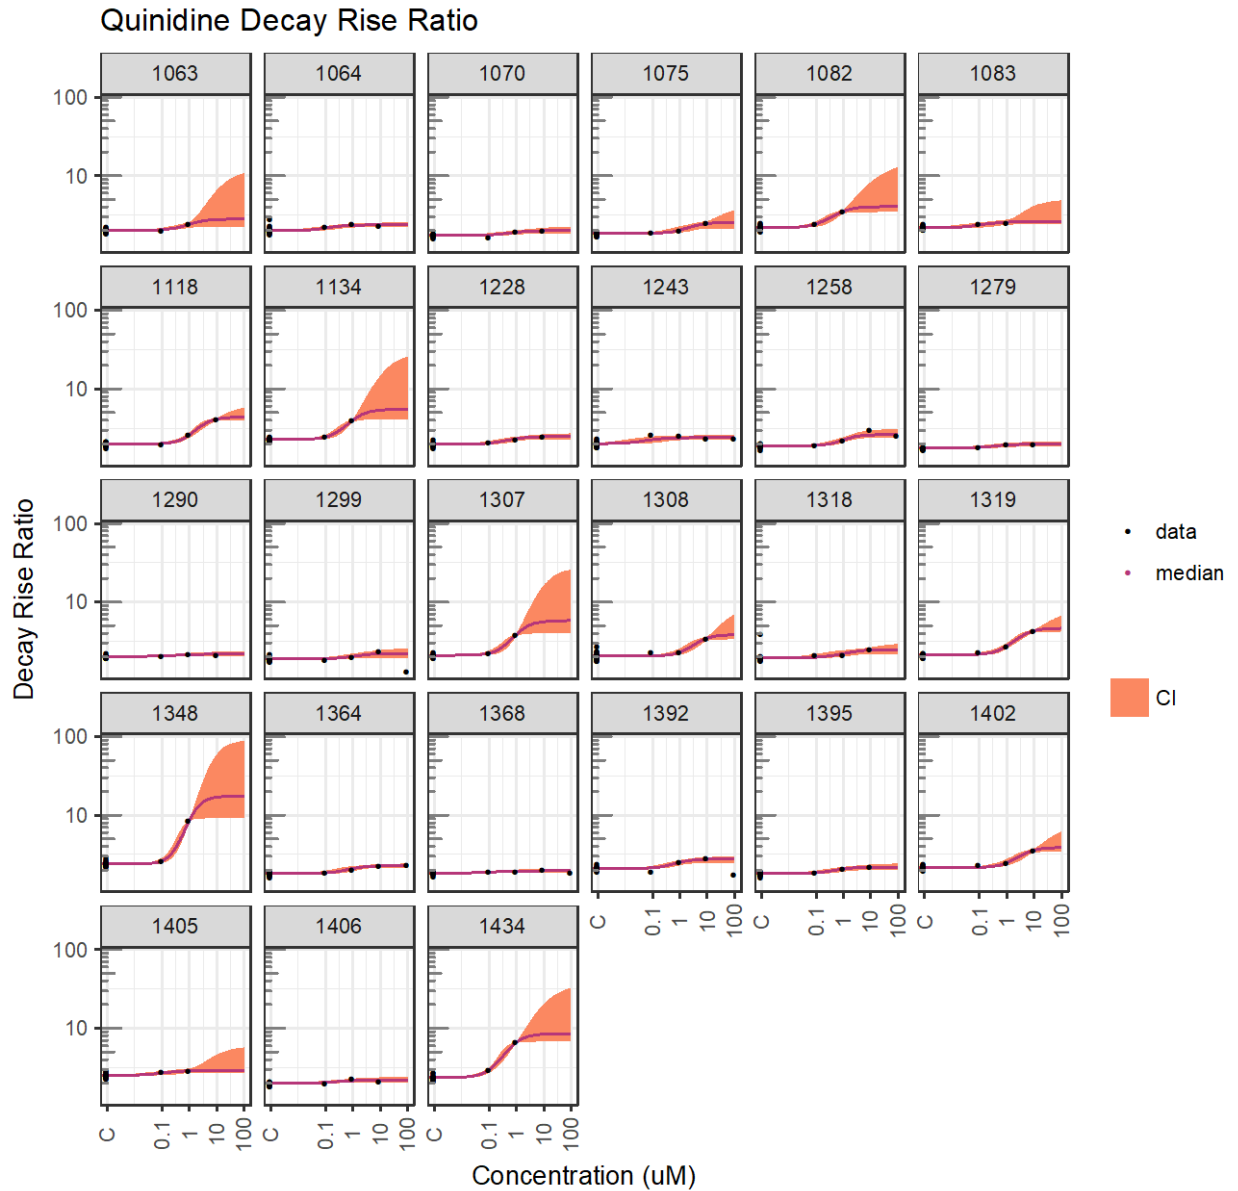

**Figure S7. Concentration-response model fits for quinidine showing decay-rise data (black dots); median prediction (colored lines) and 95% CI (colored shadings). Each panel is a different donor.**

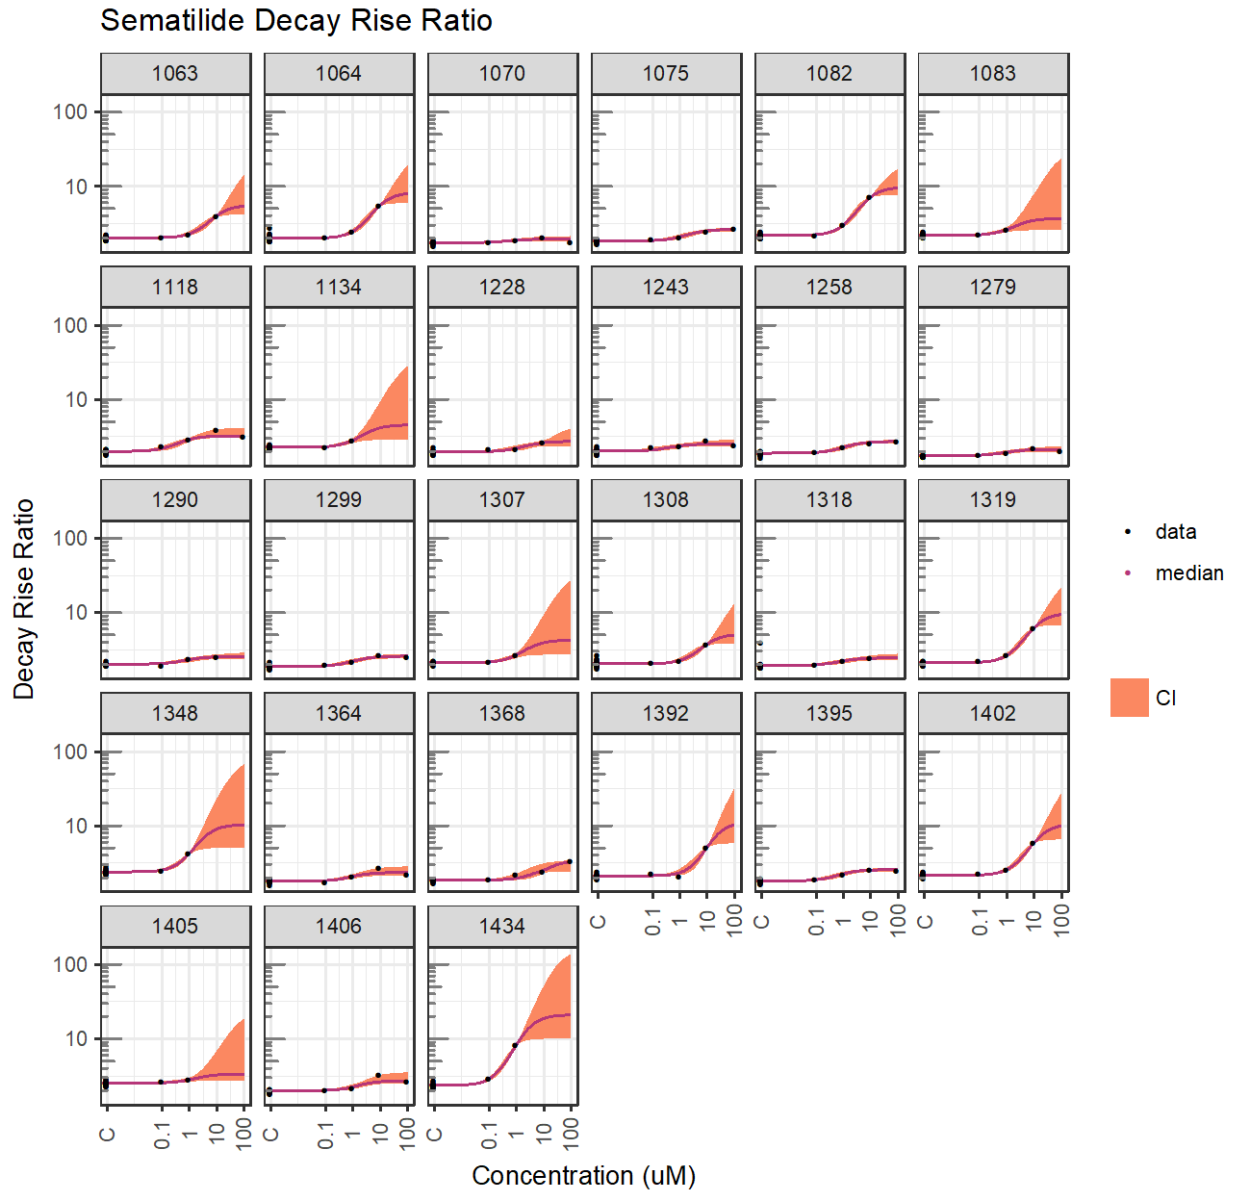

**Figure S8. Concentration-response model fits for sematilide showing decay-rise data (black dots); median prediction (colored lines) and 95% CI (colored shadings). Each panel is a different donor.**

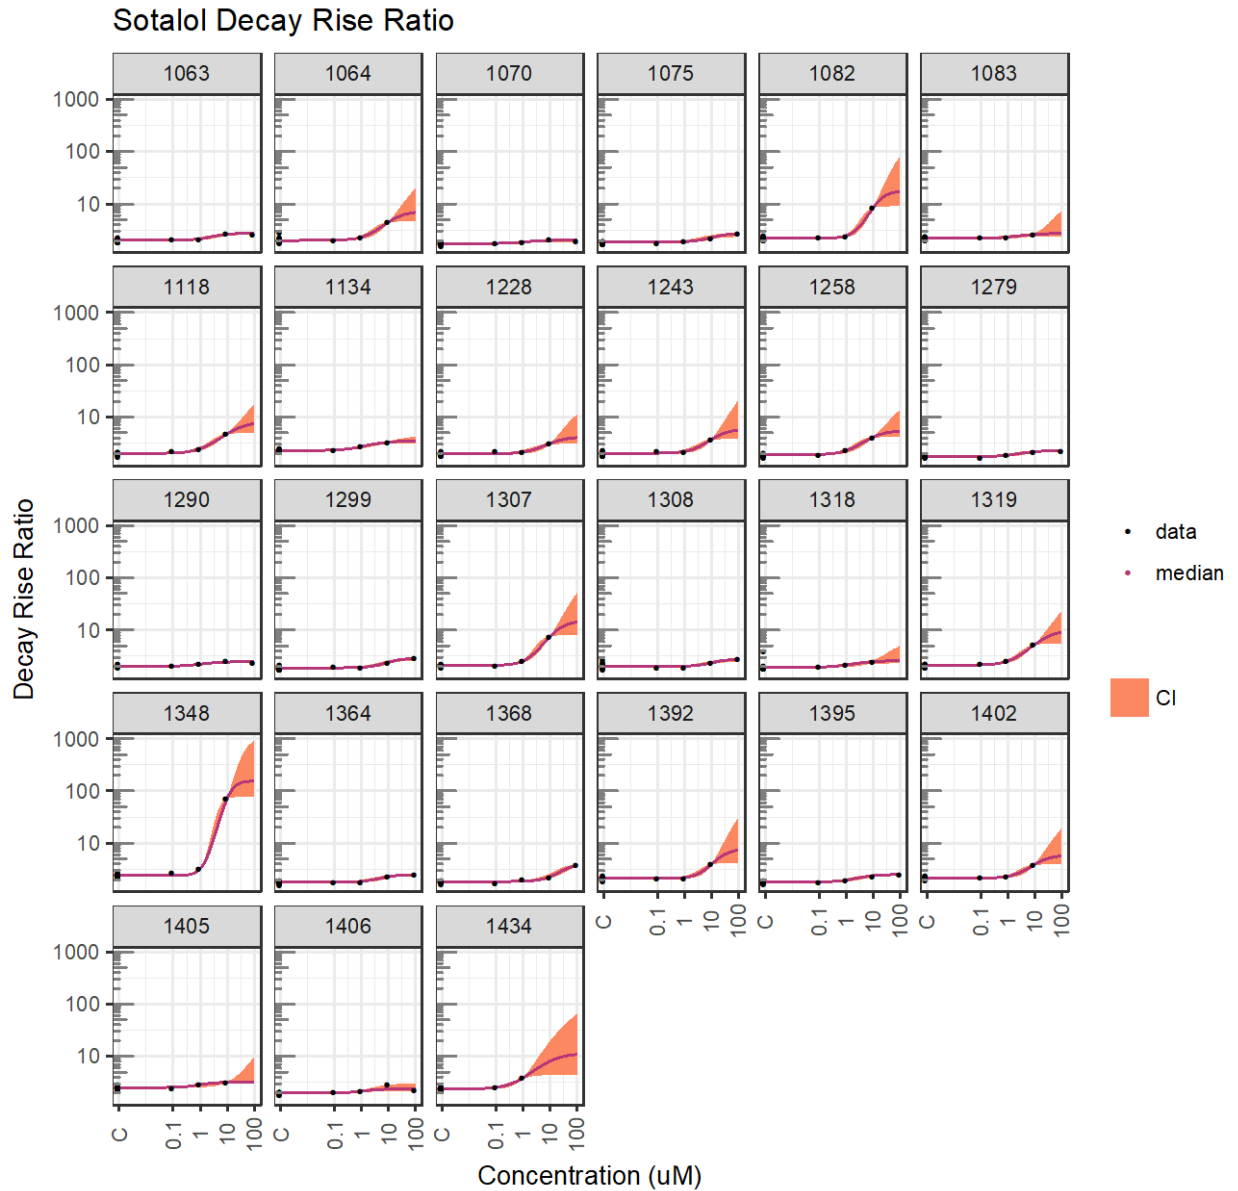

**Figure S9. Concentration-response model fits for sotalol showing decay-rise data (black dots); median prediction (colored lines) and 95% CI (colored shadings). Each panel is a different donor.**

### Vernacalant Decay Rise Ratio

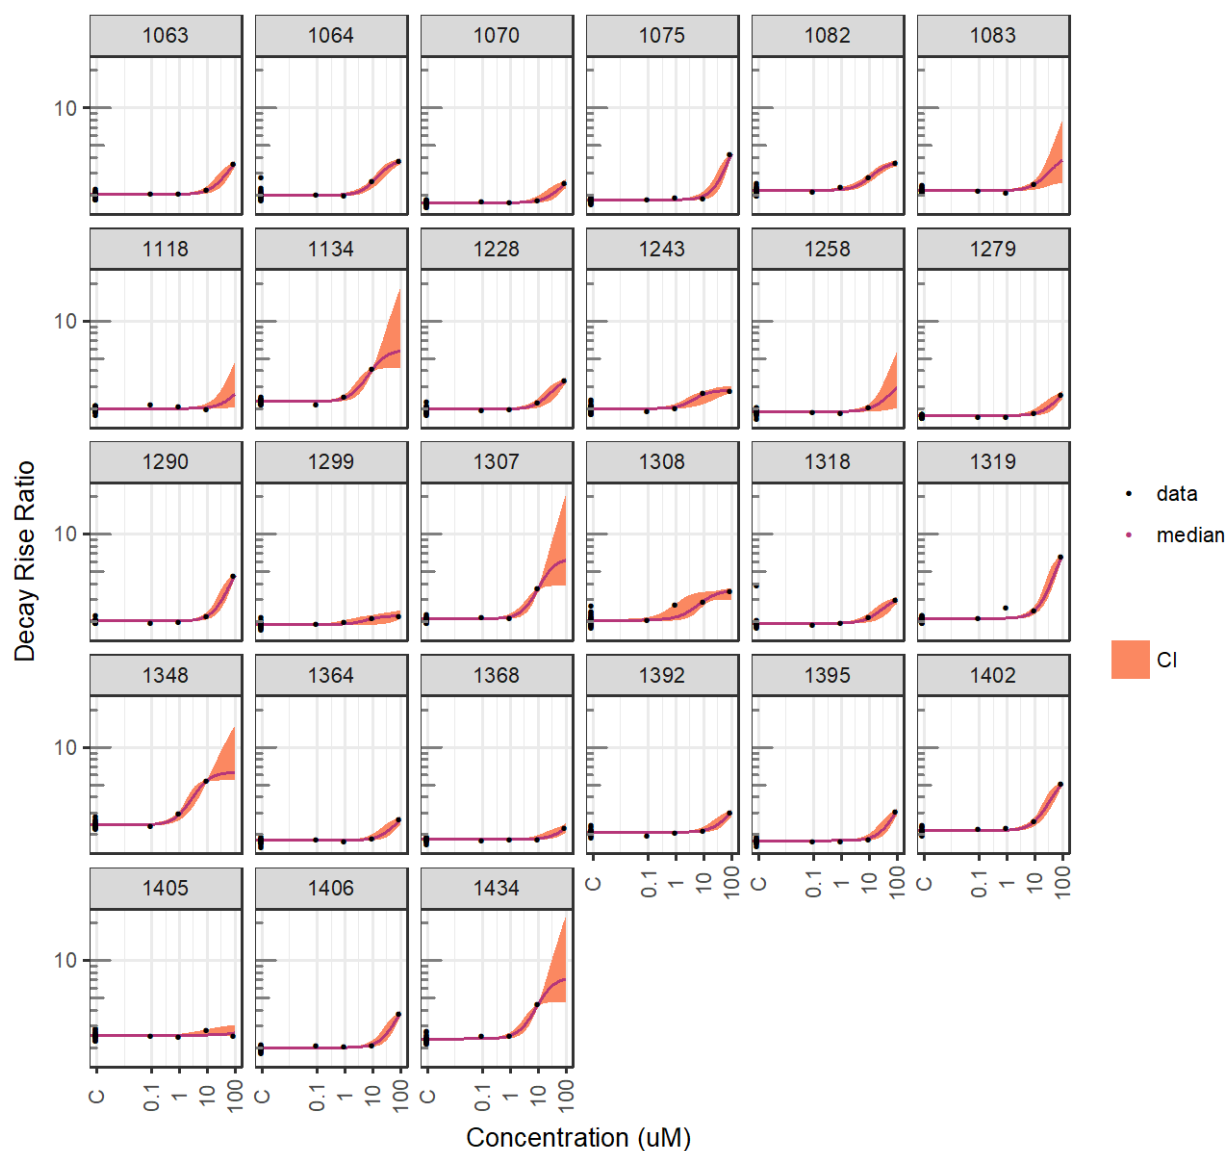

**Figure S10. Concentration-response model fits for vernacalant showing decay-rise data (black dots); median prediction (colored lines) and 95% CI (colored shadings). Each panel is a different donor.**

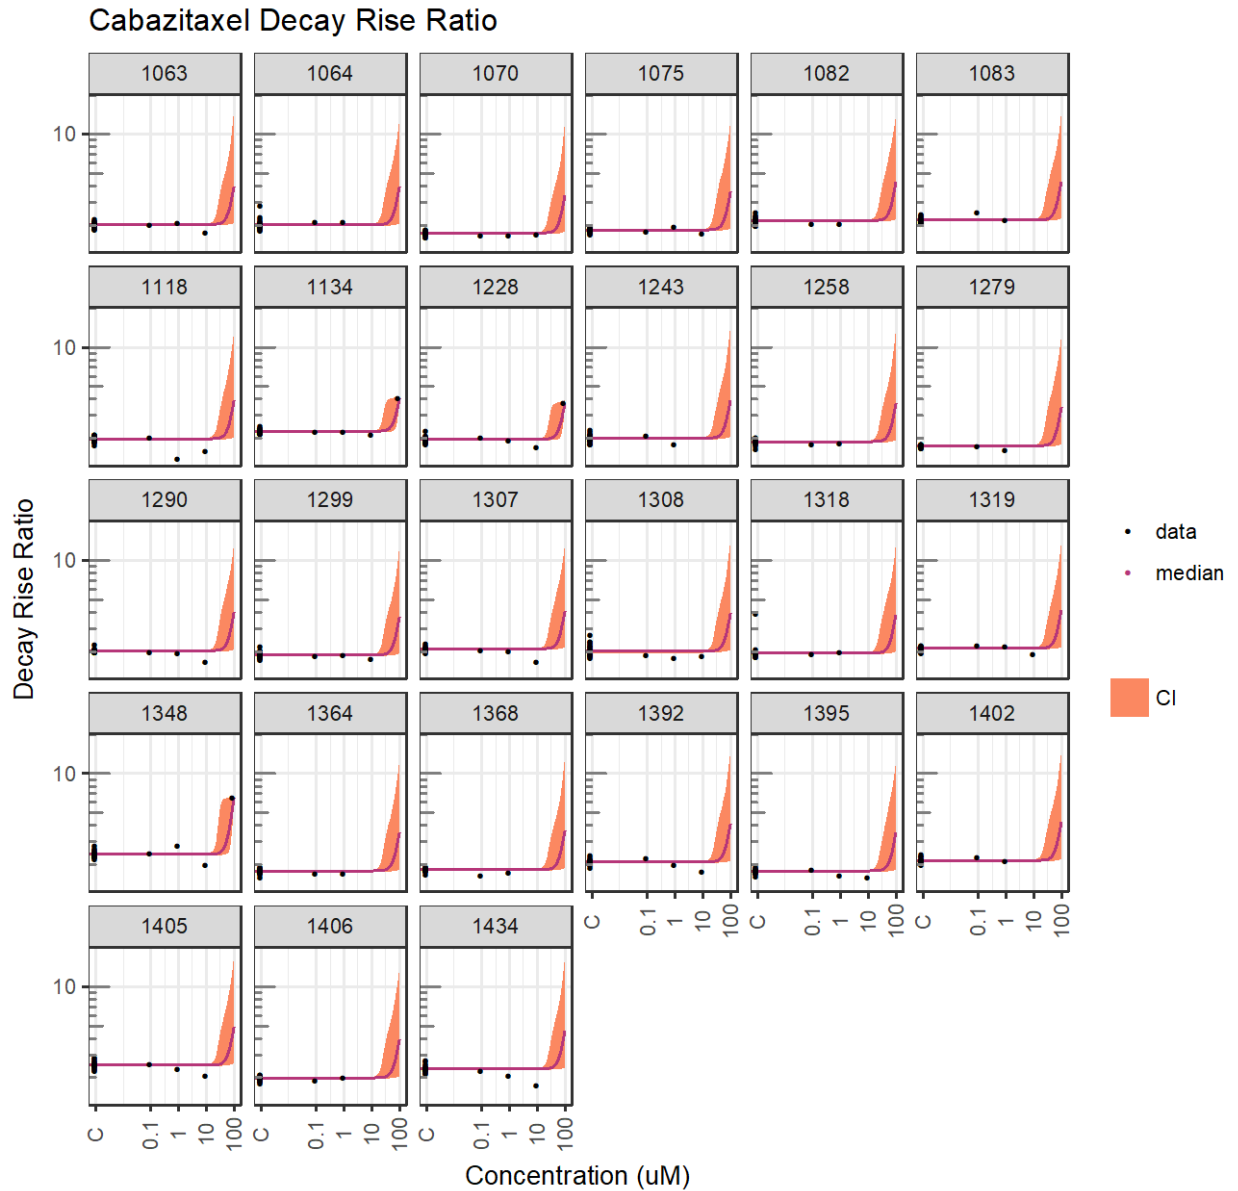

**Figure S11. Concentration-response model fits for cabazitaxel showing decay-rise data (black dots); median prediction (colored lines) and 95% CI (colored shadings). Each panel is a different donor.**

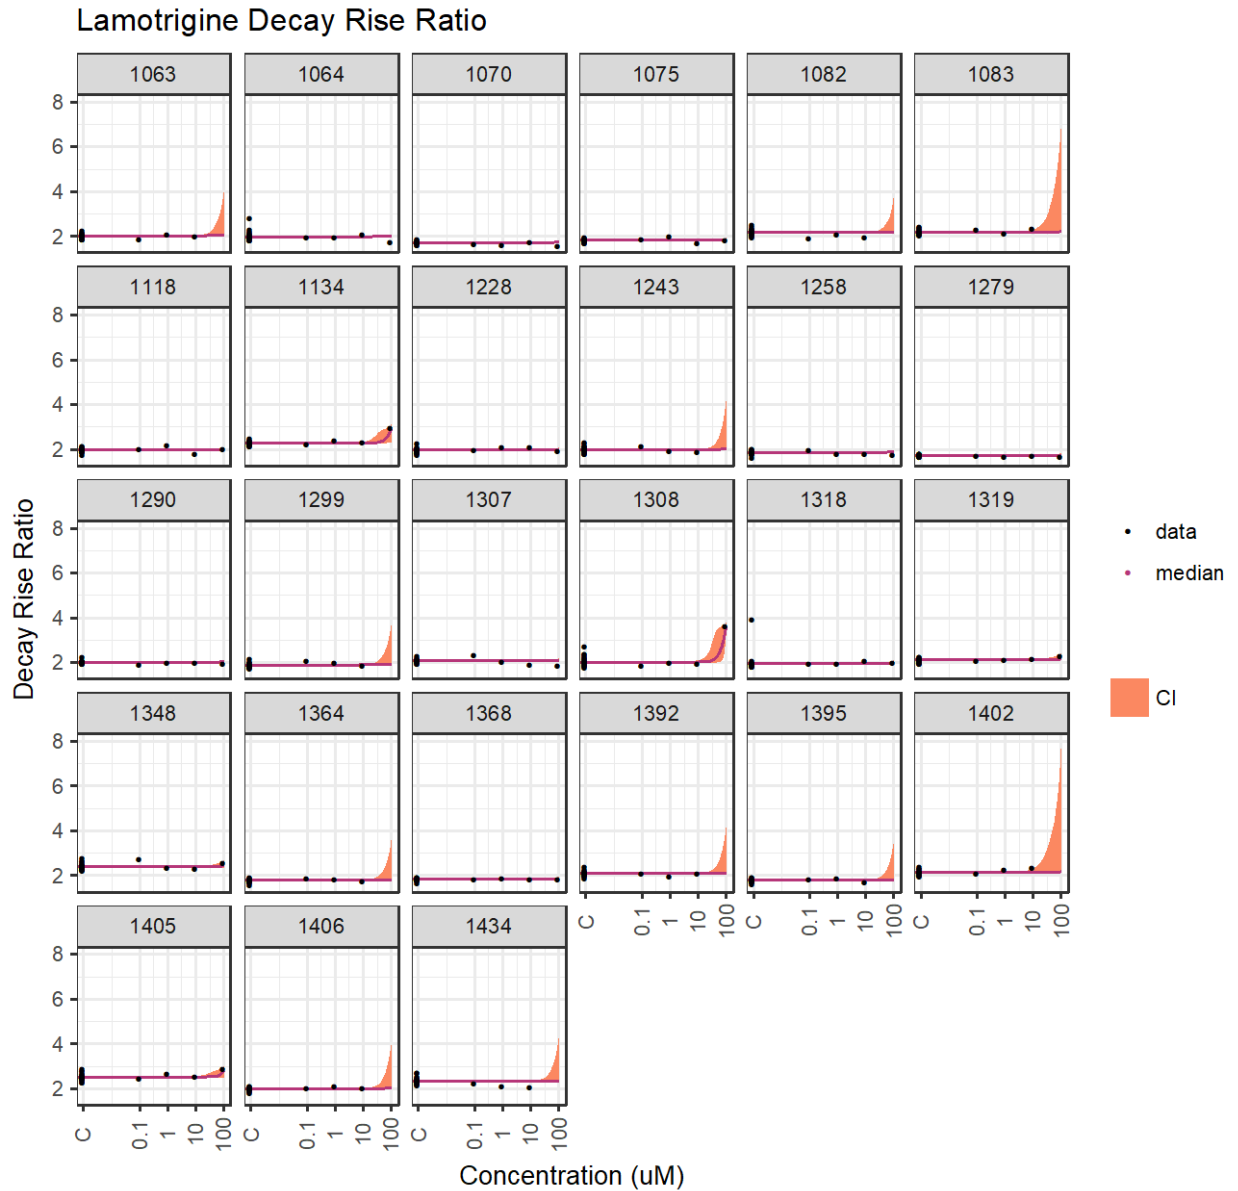

**Figure S12. Concentration-response model fits for lamotrigine showing decay-rise data (black dots); median prediction (colored lines) and 95% CI (colored shadings). Each panel is a different donor.**

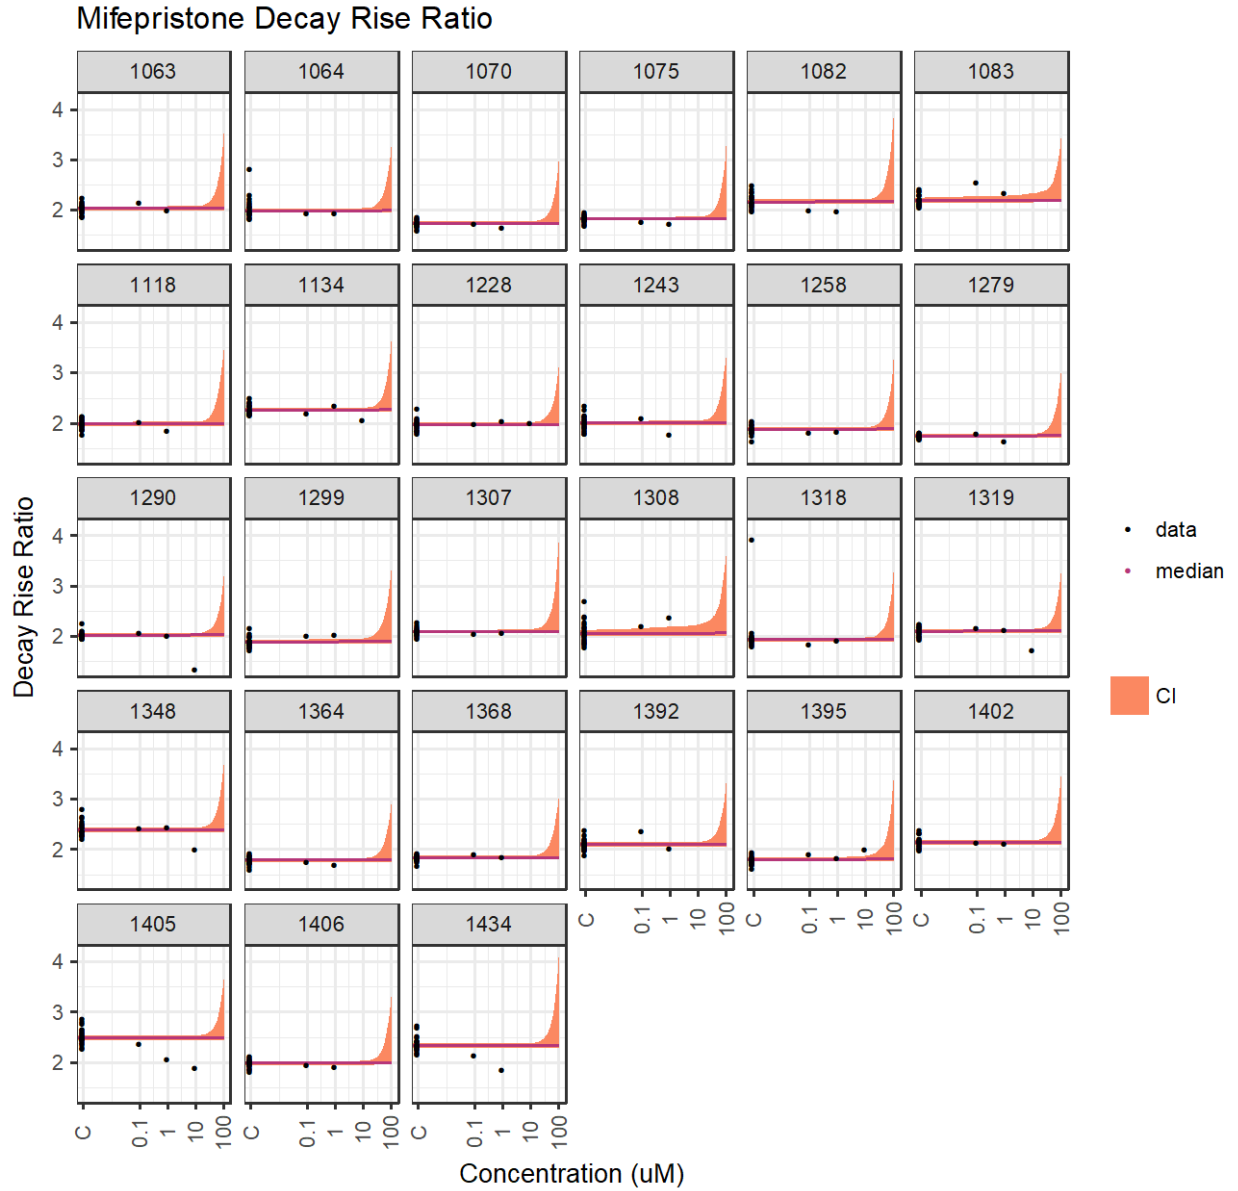

**Figure S13. Concentration-response model fits for mifepristone showing decay-rise data (black dots); median prediction (colored lines) and 95% CI (colored shadings). Each panel is a different donor.**



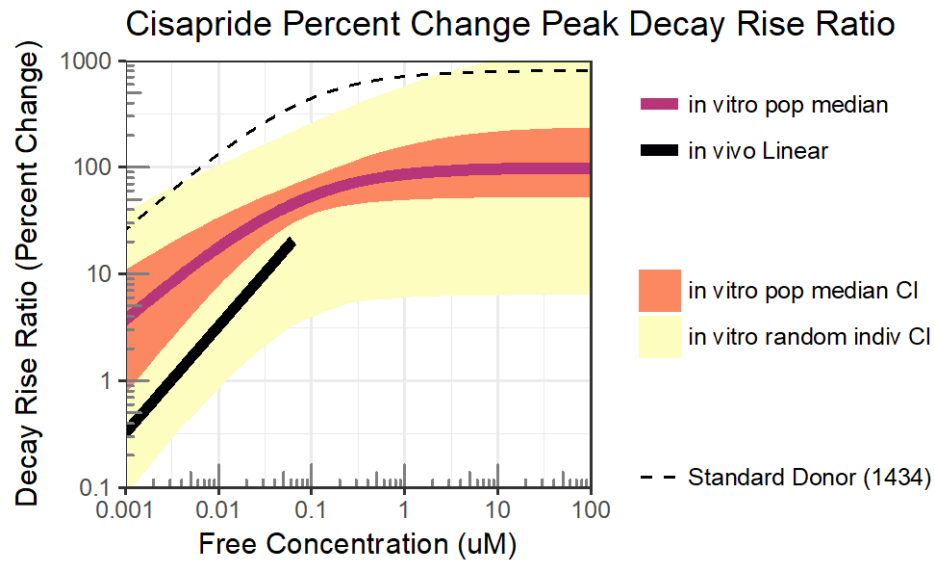

**Figure S14.** Comparison of cisapride concentration-response functions based on *in vivo* data (black line) compared to *in vitro* data (magenta line: population median; orange region: 95% confidence interval on population median; yellow region: 95% confidence interval on random individual; dashed line: standard iCell donor (1434)).

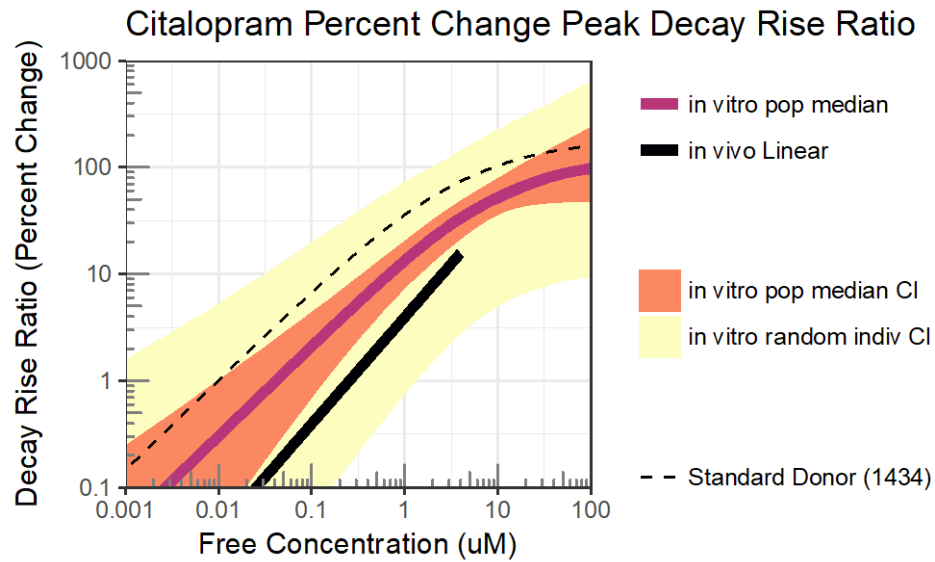

**Figure S15.** Comparison of citalopram concentration-response functions based on *in vivo* data (black line) compared to *in vitro* data (magenta line: population median; orange region: 95% confidence interval on population median; yellow region: 95% confidence interval on random individual; dashed line: standard iCell donor (1434)).

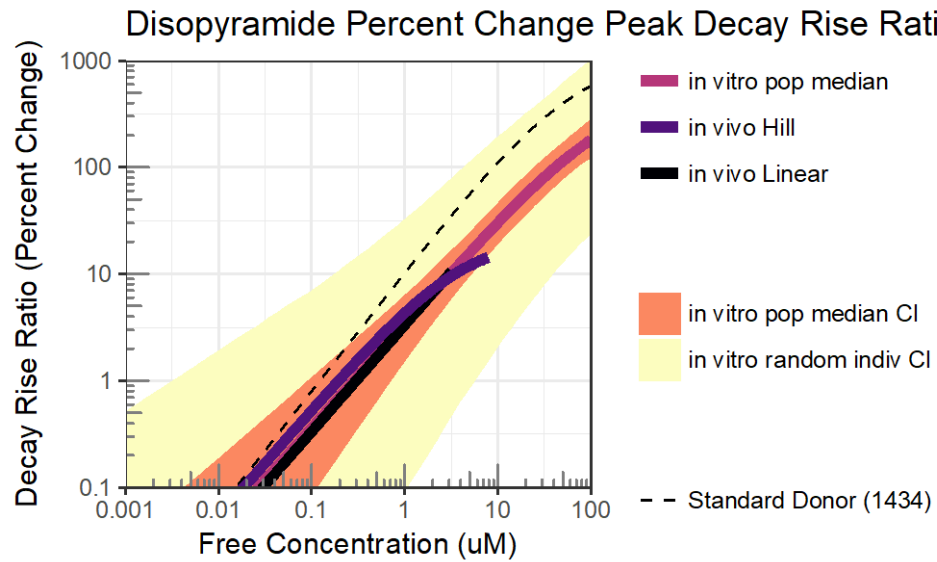

**Figure S16.** Comparison of disopyramide concentration-response functions based on *in vivo* data (black line [linear]; purple line [Hill]) compared to *in vitro* data (magenta line: population median; orange region: 95% confidence interval on population median; yellow region: 95% confidence interval on random individual; dashed line: standard iCell donor (1434)).

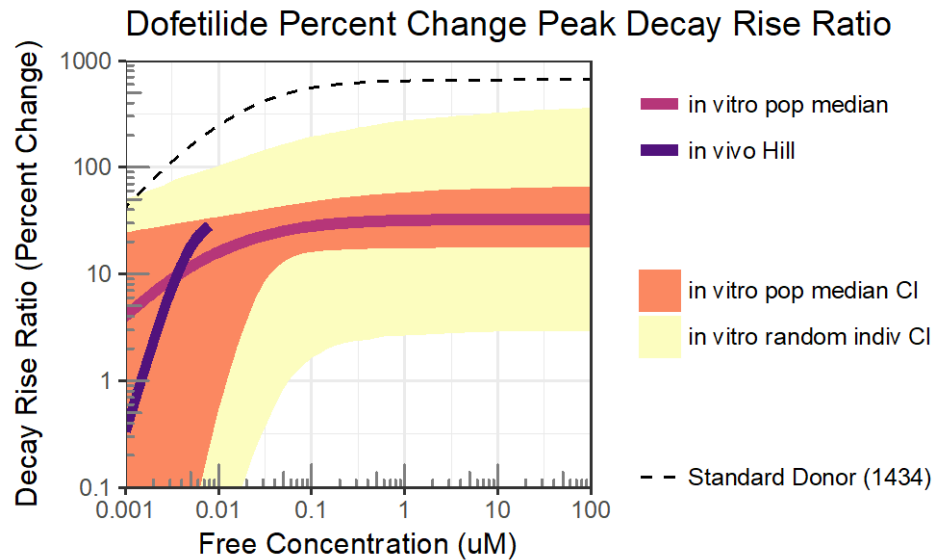

**Figure S17. Comparison of dofetilide concentration-response functions based on *in vivo* data (purple line) compared to *in vitro* data (magenta line: population median; orange region: 95% confidence interval on population median; yellow region: 95% confidence interval on random individual; dashed line: standard iCell donor (1434)).**

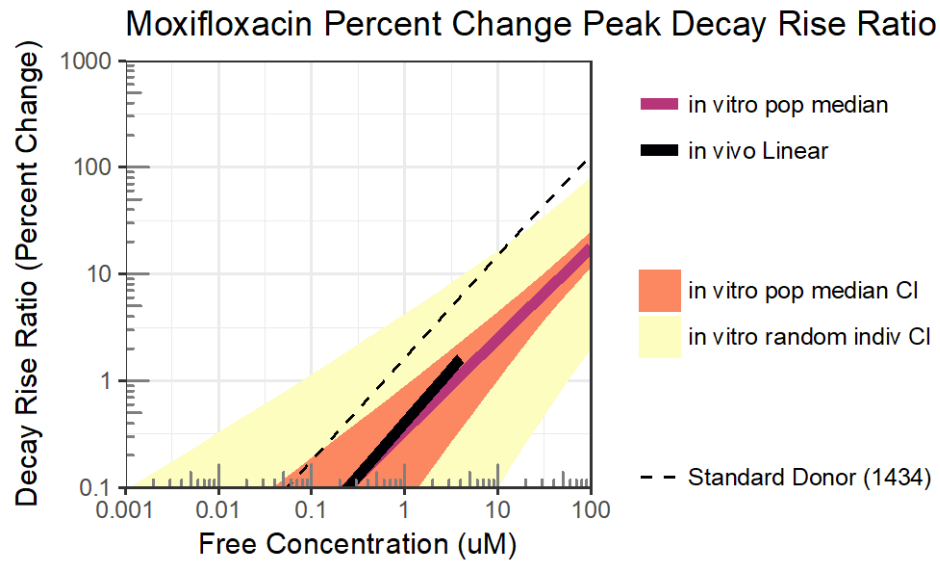

**Figure S18.** Comparison of moxifloxacin concentration-response functions based on *in vivo* data (black line) compared to *in vitro* data (magenta line: population median; orange region: 95% confidence interval on population median; yellow region: 95% confidence interval on random individual; dashed line: standard iCell donor (1434)).

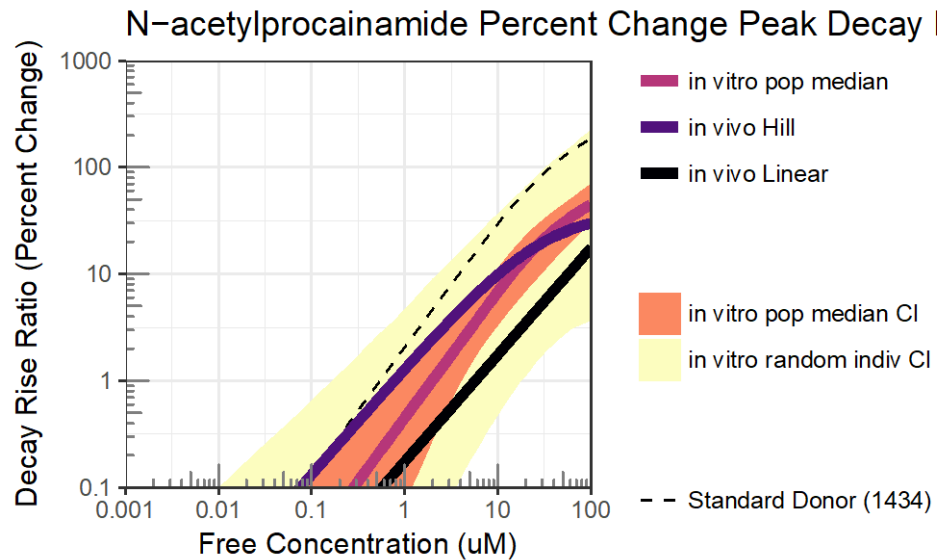

**Figure S19. Comparison of n-acetylleprocainamide concentration-response functions based on *in vivo* data (black line [linear], purple line [Hill]) compared to *in vitro* data (magenta line: population median; orange region: 95% confidence interval on population median; yellow region: 95% confidence interval on random individual; dashed line: standard iCell donor (1434)).**

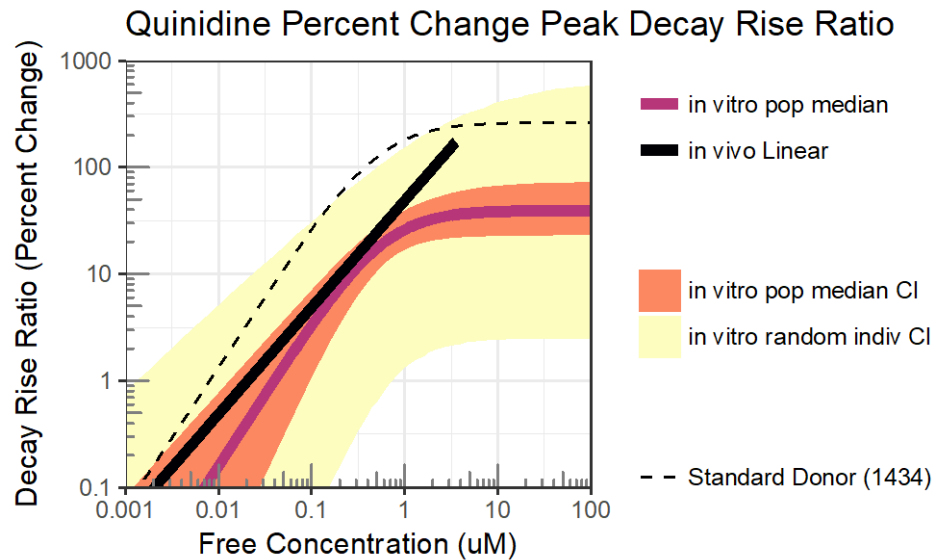

**Figure S20.** Comparison of quinidine concentration-response functions based on *in vivo* data (black line) compared to *in vitro* data (magenta line: population median; orange region: 95% confidence interval on population median; yellow region: 95% confidence interval on random individual; dashed line: standard iCell donor (1434)).

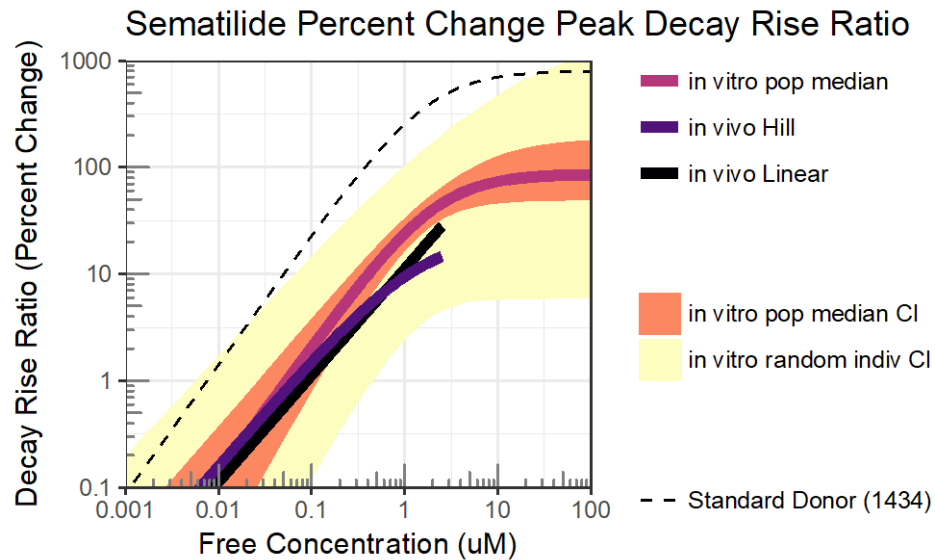

**Figure S21. Comparison of sematilide concentration-response functions based on *in vivo* data (black line [linear] and purple line [Hill]) compared to *in vitro* data (magenta line: population median; orange region: 95% confidence interval on population median; yellow region: 95% confidence interval on random individual; dashed line: standard iCell donor (1434)).**



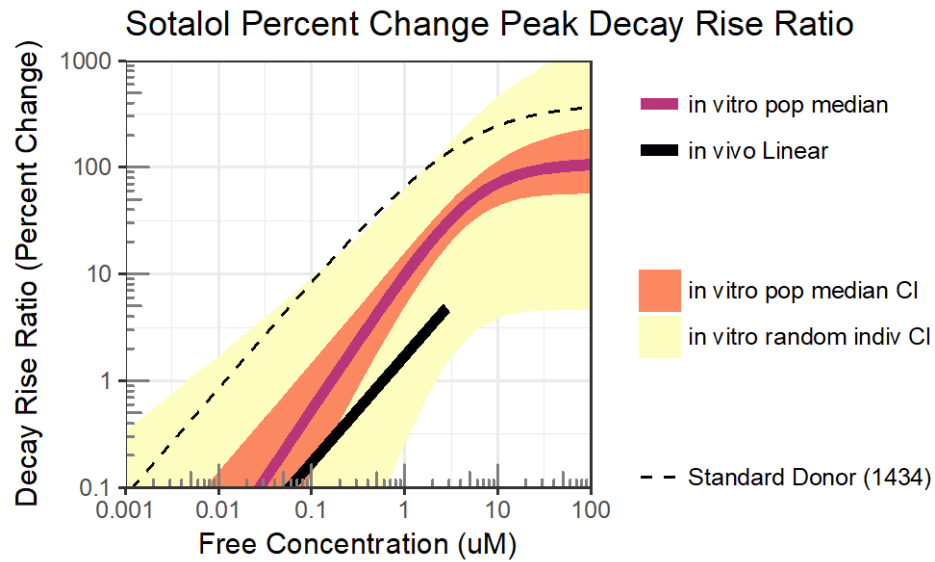

**Figure S22 Comparison of sotalol concentration-response functions based on *in vivo* data (black line) compared to *in vitro* data (magenta line: population median; orange region: 95% confidence interval on population median; yellow region: 95% confidence interval on random individual; dashed line: standard iCell donor (1434)).**

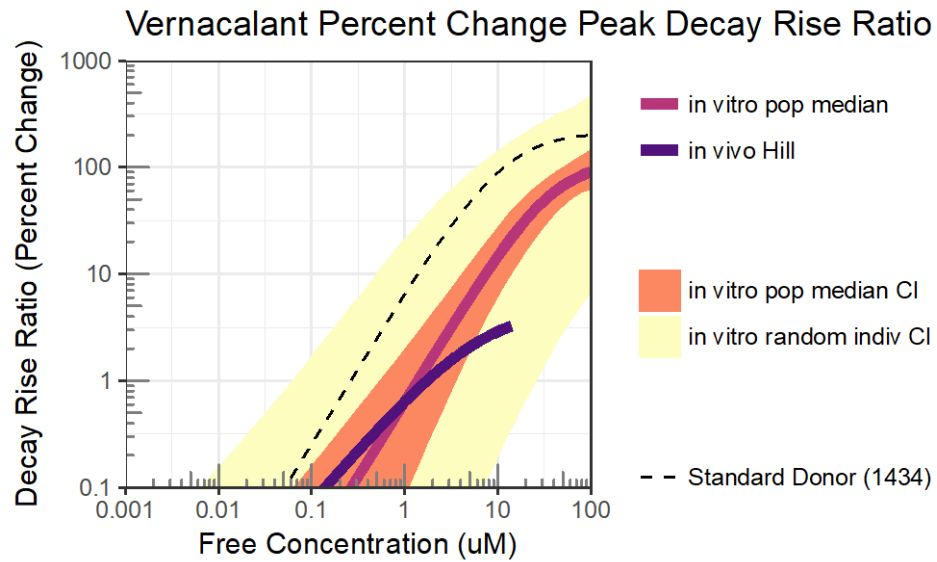

**Figure S23.** Comparison of vernacalant concentration-response functions based on *in vivo* data (purple line) compared to *in vitro* data (magenta line: population median; orange region: 95% confidence interval on population median; yellow region: 95% confidence interval on random individual; dashed line: standard iCell donor (1434)).

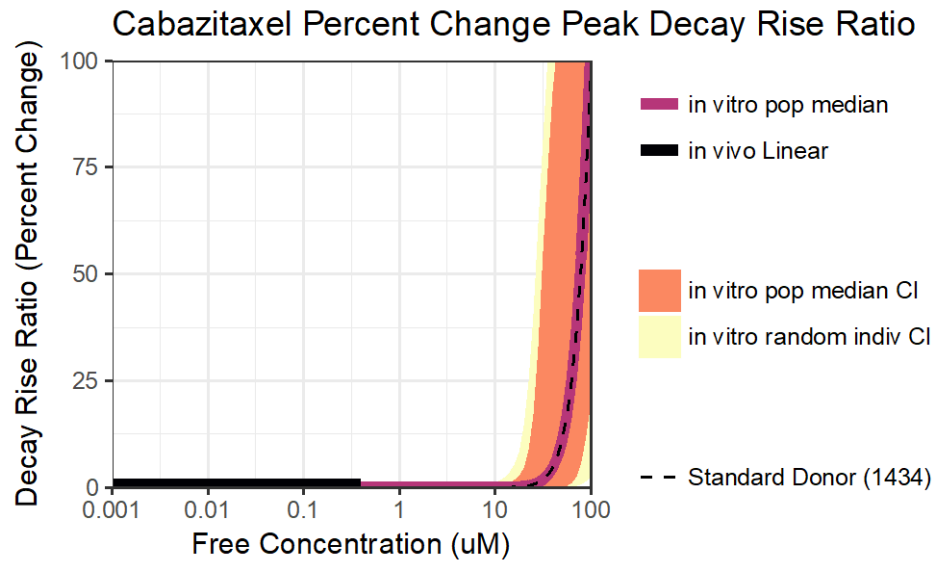

**Figure S24. Comparison of cabazitaxel concentration-response functions based on *in vivo* data (black line) compared to *in vitro* data (magenta line: population median; orange region: 95% confidence interval on population median; yellow region: 95% confidence interval on random individual; dashed line: standard iCell donor (1434)).**

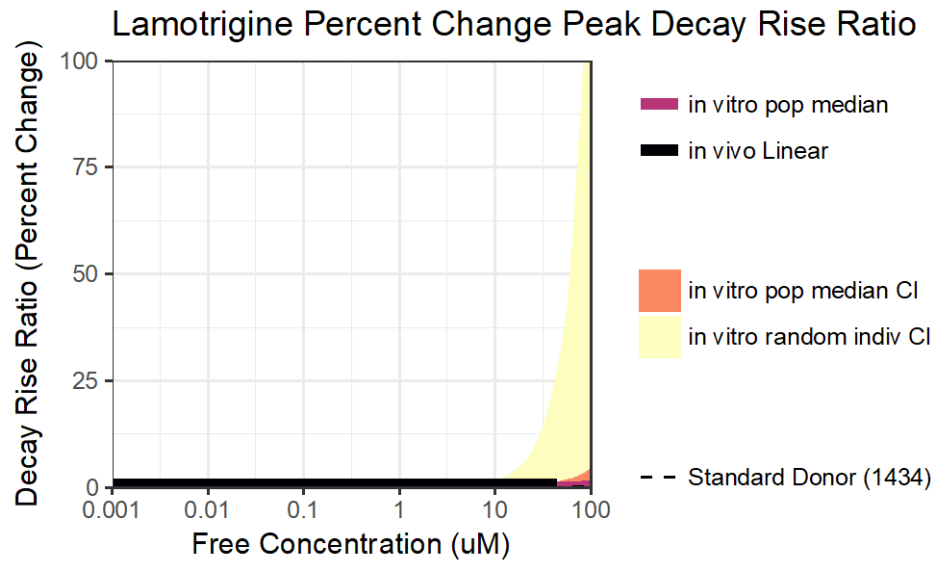

**Figure S25. Comparison of lamotrigine concentration-response functions based on *in vivo* data (black line) compared to *in vitro* data (magenta line: population median; orange region: 95% confidence interval on population median; yellow region: 95% confidence interval on random individual; dashed line: standard iCell donor (1434)).**

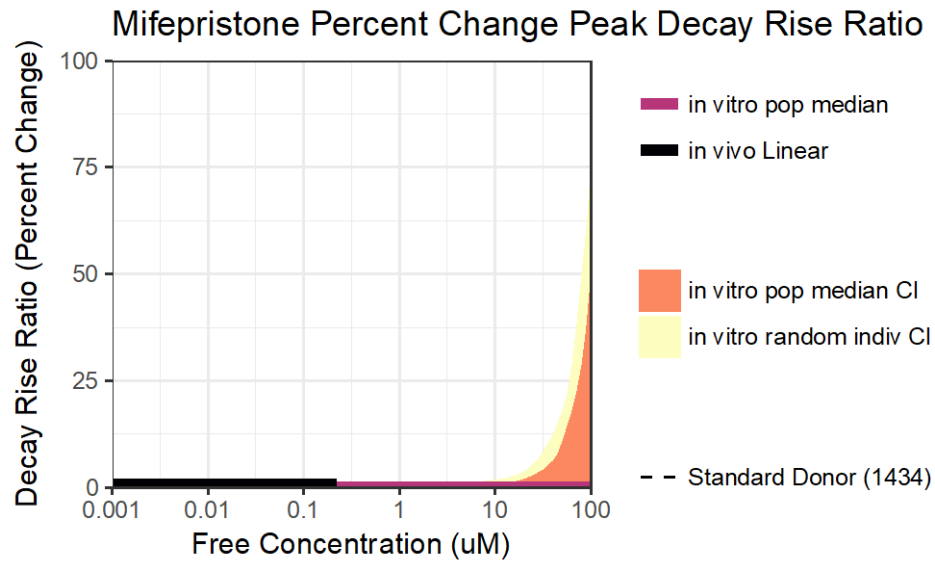

**Figure S26. Comparison of mifepristone concentration-response functions based on *in vivo* data (black line) compared to *in vitro* data (magenta line: population median; orange region: 95% confidence interval on population median; yellow region: 95% confidence interval on random individual; dashed line: standard iCell donor (1434)).**

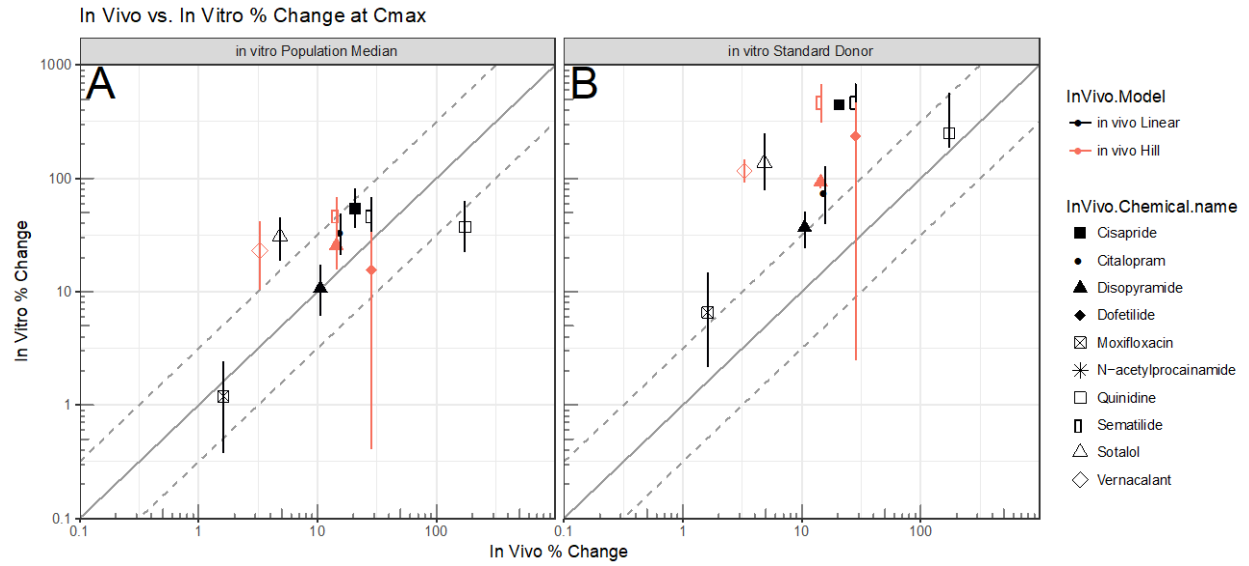

**Figure S27.** Comparison of *in vivo* response (% change) at Cmax with *in vitro* response (% change) at Cmax, based on **(A)** population median and **(B)** standard donor (1434).

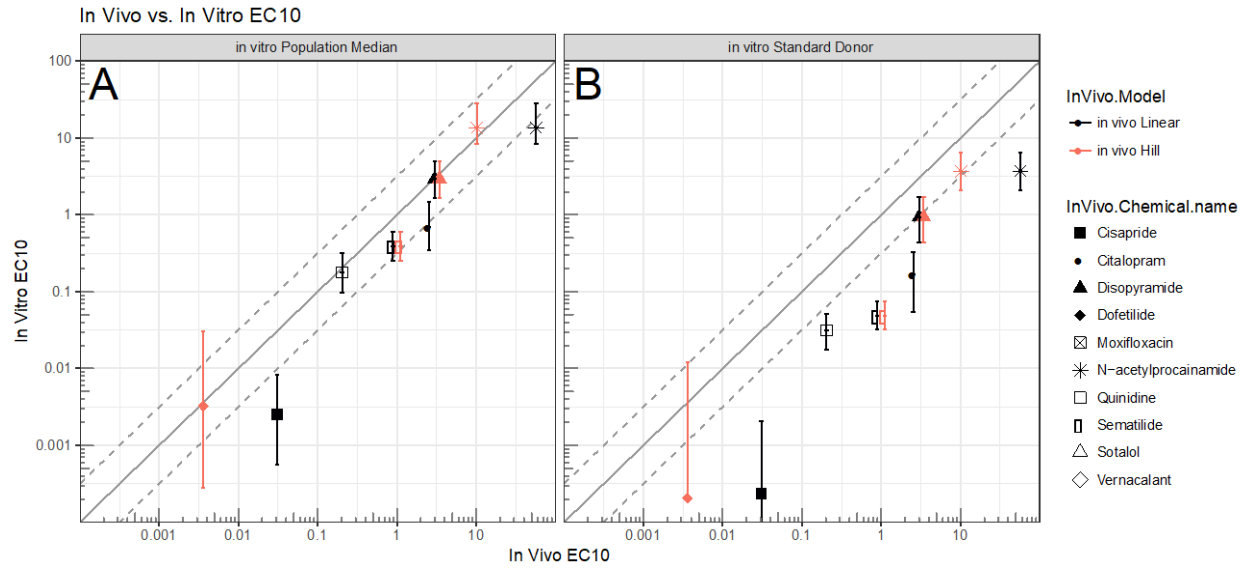

**Figure S28.** Comparison of *in vivo* EC<sub>10</sub> with *in vitro* EC<sub>10</sub>, based on **(A)** population median and **(B)** standard donor (1434).

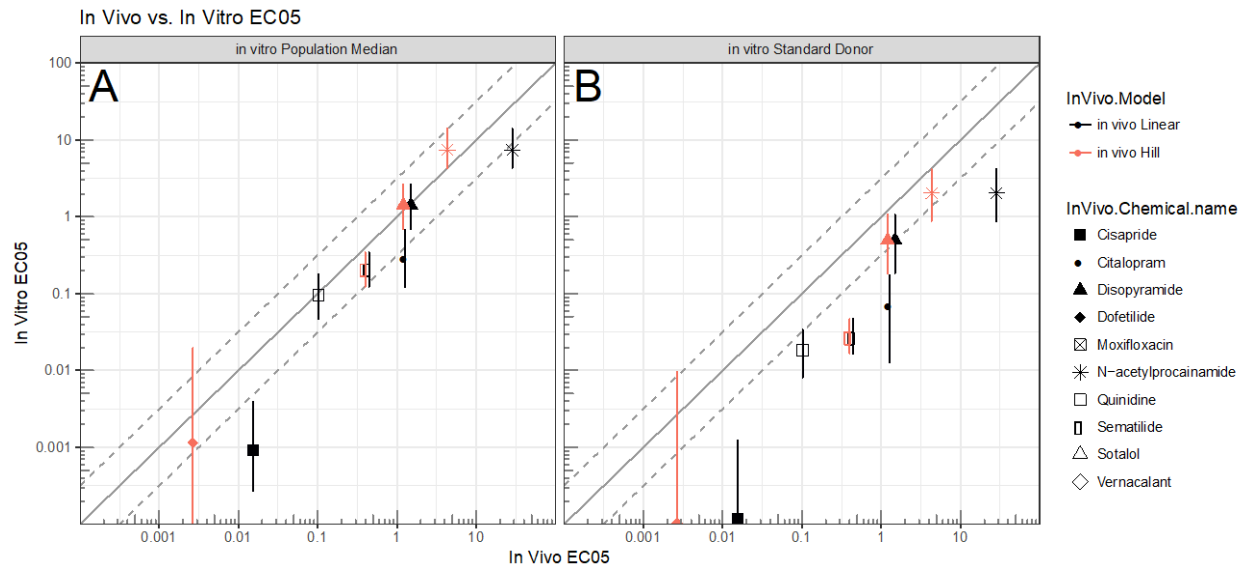

**Figure S29.** Comparison of *in vivo* EC<sub>05</sub> with *in vitro* EC<sub>05</sub>, based on **(A)** population median and **(B)** standard donor (1434).



**SUPPLEMENTAL TABLES**

**Table S1. Single Reaction Monitoring parameters for HPLC-MS/MS Analysis**

| <b>Drug name</b>           | <b>CAS #</b> | <b>MW</b> | <b>Molecular formula (analyte)</b>                                           | <b>MW of interest</b> | <b>[M+H]</b> | <b>Mass transition (m/z)</b> | <b>CE</b> |
|----------------------------|--------------|-----------|------------------------------------------------------------------------------|-----------------------|--------------|------------------------------|-----------|
| citalopram hydrobromide    | 59729-33-8   | 405.3     | C <sub>20</sub> H <sub>21</sub> FN <sub>2</sub> O                            | 324.4                 | 325.4        | 325→109                      | 30        |
| disopyramide phosphate     | 22059-60-5   | 437.5     | C <sub>21</sub> H <sub>29</sub> N <sub>3</sub> O                             | 339.5                 | 340.5        | 340→239                      | 15        |
| dofetilide                 | 115256-11-6  | 441.6     | C <sub>19</sub> H <sub>27</sub> N <sub>3</sub> O <sub>5</sub> S <sub>2</sub> | 441.6                 | 442.6        | 442→198                      | 50        |
| lamotrigine                | 84057-84-1   | 256.1     | C <sub>9</sub> H <sub>7</sub> Cl <sub>2</sub> N <sub>5</sub>                 | 256.1                 | 257.1        | 256→187                      | 37        |
| mifepristone               | 84371-65-3   | 429.6     | C <sub>29</sub> H <sub>35</sub> NO <sub>2</sub>                              | 429.6                 | 430.6        | 430→372                      | 35        |
| moxifloxacin hydrochloride | 186826-86-8  | 437.9     | C <sub>21</sub> H <sub>24</sub> FN <sub>3</sub> O <sub>4</sub>               | 401.4                 | 402.4        | 402→358                      | 19        |
| n-acetylprocainamide       | 32795-44-1   | 277.4     | C <sub>15</sub> H <sub>23</sub> N <sub>3</sub> O <sub>2</sub>                | 277.4                 | 278.4        | 278→205                      | 18        |
| quinidine sulfate          | 50-54-4      | 746.9     | C <sub>20</sub> H <sub>24</sub> N <sub>2</sub> O <sub>2</sub>                | 324.4                 | 325.4        | 325→81                       | 33        |
| Sematilide                 | 101526-83-4  | 313.4     | C <sub>14</sub> H <sub>23</sub> N <sub>3</sub> O <sub>3</sub> S              | 313.4                 | 314.4        | 314→162                      | 37        |
| sotalol hydrochloride      | 959-24-0     | 308.8     | C <sub>12</sub> H <sub>20</sub> N <sub>2</sub> O <sub>3</sub> S              | 272.4                 | 273.4        | 273→255                      | 20        |
| Vernakalant hydrochloride  | 748810-28-8  | 385.9     | C <sub>20</sub> H <sub>31</sub> NO <sub>4</sub>                              | 349.5                 | 350.5        | 350→168                      | 35        |
| cisapride monohydrate      | 260779-88-2  | 484.0     | C <sub>23</sub> H <sub>29</sub> ClFN <sub>3</sub> O <sub>4</sub>             | 465.9                 | 466.9        | 466→184                      | 35        |
| cabazitaxel                | 183133-96-2  | 835.9     | C <sub>45</sub> H <sub>57</sub> NO <sub>14</sub>                             | 835.9                 | 836.9        | 836.6→555.5                  | 13        |

ZORBAX SSHD Eclipse Plus C18 column (3.0 X 50 mm, 1.8 µm, catalogue #: 979757-302; Agilent, Santa Clara, CA) with a C18 guard column (2.1 X 5 mm, 1.8 µm, catalogue #: 821725-901; Agilent, Santa Clara, CA) were used for chromatography with the following solvent gradient [A: water with 0.1% formic acid; B: methanol with 0.1% formic acid, shown as Time (A%)]: 0(90)-1(90)-3(10)-4(2)-5(2)-5.2(90)-8(90).

**Table S2. Plasma protein binding (free fraction) reported in literature**

| <b>Drug</b>                     | <b>CAS N</b>                 | <b>Free fraction</b>                                                            | <b>References</b> |
|---------------------------------|------------------------------|---------------------------------------------------------------------------------|-------------------|
| Cisapride (monohydrate)         | 81098-60-4<br>(260779-88-2)  | 0.02-0.025<br>0.0395±0.037                                                      | (2, 3)            |
| Citalopram<br>(hydrobromide)    | 59729-33-8<br>(59729-32-7)   | 0.2                                                                             | (4)               |
| Disopyramide (phosphate)        | 3737-009-005<br>(22059-60-5) | 0.25-0.50                                                                       | (5)               |
| Dofetilide                      | 115256-11-6                  | 0.17-0.337 (in all patients)<br>0.337±0.021 (in patients<br>with normal kidney) | (6)               |
| Moxifloxacin<br>(hydrochloride) | 151096-09-2<br>(186826-86-8) | 0.3-0.5                                                                         | (7)               |
| N-acetylprocainamide            | 32795-44-1                   | 0.3                                                                             | (8)               |
| Quinidine (sulfate)             | 56-54-2<br>(50-54-4)         | 0.1                                                                             | (8-10)            |
|                                 |                              | 0.12-0.2 (adult)                                                                |                   |
|                                 |                              | 0.3-0.5 (pregnant)                                                              |                   |
|                                 |                              | 0.77<br>0.23 (0.154-0.47)                                                       |                   |
| Sematilide                      | 101526-83-4                  | 0.96                                                                            | (11)              |
| Sotalol (hydrochloride)         | 3930-20-9<br>(959-24-0)      | 1.0                                                                             | (12)              |
| Vernacalant (HCl)               | 794466-70-9<br>(748810-28-8) | 0.53-0.63                                                                       | (13)              |
| Cabazitaxel                     | 183133-96-2                  | 0.05–0.066                                                                      | (14, 15)          |
| Lamotrigine                     | 84057-84-1                   | 0.45                                                                            | (16)              |
| Mifepristone                    | 84371-65-3                   | 0.01-0.02                                                                       | (17, 18)          |

**Table S3. Armitage et al. (2014)(19) model generic input parameters.**

| Test system parameters                  |                                                                          | Source       |         |
|-----------------------------------------|--------------------------------------------------------------------------|--------------|---------|
| 384-well Cell Culture Plate             |                                                                          | User-defined |         |
| Size of surface area (cm <sup>2</sup> ) |                                                                          | User-defined | 0.36    |
| VF                                      | serum volume fraction in the bulk medium (L/L)                           | User-defined | 0.05    |
| C <sub>D</sub>                          | Concentration of DOM (mg/L)                                              | User-defined | 0       |
| D <sub>D</sub>                          | Density of DOM (kg/L)                                                    | User-defined | 1       |
| C <sub>Sa</sub>                         | Serum albumin concentration (g/L)                                        | User-defined | 21.65*  |
| C <sub>Sl</sub>                         | Serum lipid concentration (g/L)                                          | User-defined | 1.9     |
| D <sub>Sa</sub>                         | Density of serum albumin (kg/L)                                          | User-defined | 1.36    |
| D <sub>Sl</sub>                         | Density of serum lipids (kg/L)                                           | User-defined | 1       |
| f <sub>L</sub>                          | volume fraction of total lipid equivalent (i.e., pseudo-octanol content) | User-defined | 0.05    |
| D <sub>C</sub>                          | Density (cells/mL)                                                       | User-defined | 1       |
| M <sub>C</sub>                          | Mass (cells) (mg)                                                        | User-defined | 3.0     |
| C <sub>S</sub>                          | Ionic strength of the medium (M)                                         | User-defined | 0.15    |
| T <sub>S</sub>                          | System temperature (C°)                                                  | User-defined | 37      |
| V <sub>T</sub>                          | Total system volume                                                      | User-defined | 0.149   |
| V <sub>M</sub>                          | Bulk medium (excluding cells/tissue) (Plating medium)                    | User-defined | 0.05    |
| V <sub>A</sub>                          | volume of head space                                                     | Calculated   | 0.1     |
| V <sub>W</sub>                          | volume of medium (aqueous phase only)                                    | Calculated   | 0.05    |
| V <sub>Sa</sub>                         | volume of serum albumin                                                  | Calculated   | 4.4E-05 |
| V <sub>Sl</sub>                         | volume of serum lipids                                                   | Calculated   | 4.8E-06 |
| V <sub>D</sub>                          | volume of DOM                                                            | Assumed      | 0       |
| V <sub>C</sub>                          | volume of cell/tissue (seeding volume)                                   | User-defined | 6.48E-5 |

**Table S4. Armitage et al. (2014)(19) model chemical-specific input parameters.**

| Name                       | CAS         | MW<br>(g/mol) | MP<br>(°C) | log K <sub>ow</sub>        |                   |      |       |         | log<br>K <sub>AW</sub> | C <sub>SAT,W</sub> (S <sub>w</sub> ) (mg/L)       |          |          |          |                   |
|----------------------------|-------------|---------------|------------|----------------------------|-------------------|------|-------|---------|------------------------|---------------------------------------------------|----------|----------|----------|-------------------|
|                            |             |               |            | log<br>K <sub>o</sub><br>w | Experi-<br>mental | Mean | min   | ma<br>x |                        | C <sub>SAT,W</sub><br>(S <sub>w</sub> )<br>(mg/L) | Mean     | min      | max      | Experi-<br>mental |
| Cisapride                  | 81098-60-4  | 466.0         | 261.5      | 3.09                       |                   | 3.19 | 3.02  | 3.65    | -18.79                 | 2.707                                             | 57.78    | 2.71     | 164.48   |                   |
| Citalopram hydrobromide    | 59729-32-7  | 405.3         | 188.0      | 2.92                       |                   | 2.92 | 2.51  | 3.39    | -7.68                  | 19.04                                             | 137.8    | 8.471    | 380.58   |                   |
| Citalopram                 | 59729-33-8  | 324.4         | 188.0      | 3.74                       |                   | 3.08 | 2.51  | 3.74    | -8.96                  | 31.09                                             | 90.505   | 6.78     | 304.6    |                   |
| Disopyramide               | 3737-09-05  | 339.5         | 94.8       | 2.58                       | 2.58              | 2.60 | 1.70  | 2.96    | -13.98                 | 44.88                                             | 20.7762  | 0.128    | 44.81    |                   |
| Dofetilide                 | 115256-11-6 | 441.6         | 251.37     | 2.14                       |                   | 1.57 | 0.12  | 2.33    | -13.37                 | 256.3                                             | 166.47   | 44.156   | 289.6634 |                   |
| Moxifloxacin               | 151096-09-2 | 401.4         | 325.0      | 0.95                       |                   | 1.17 | 0.08  | 2.43    | -17.90                 | 1146                                              | 355.667  | 5.820735 | 1144.076 |                   |
| Moxifloxacin hydrochloride | 186826-86-8 | 437.9         | 325.0      | 1.22                       |                   | 1.22 | 0.08  | 2.43    | -8.35                  | 7.81                                              | 100.7147 | 6.349405 | 287.2558 |                   |
| N-acetylprocainamide       | 32795-44-1  | 277.4         | 210.1      | 0.99                       |                   | 1.27 | 0.99  | 1.53    | -12.38                 | 2367                                              | 7183.676 | 926.3891 | 24407.86 |                   |
| Quinidine                  | 56-54-2     | 324.0         | 189.5      | 3.44                       | 3.44              | 2.86 | 1.57  | 3.44    | -13.46                 | 140                                               | 216.1    | 152.604  | 261.468  | 2.64E+02          |
| Sematilide                 | 101526-83-4 | 313.4         | 208.3      | 1.36                       |                   | 1.09 | 0.92  | 1.24    | -13.30                 | 1228                                              | 3886.41  | 91.83206 | 13069.6  |                   |
| Sotalol                    | 3930-20-9   | 272.4         | 207        | 0.24                       | 0.24              | 0.24 | -0.33 | 0.55    | -12.00                 | 876.45                                            | 5637.85  | 876.9992 | 14544.02 | 5510              |
| Vernakalant                | 794466-70-9 | 349.5         | 178.03     | 2.64                       |                   | 2.80 | 2.17  | 4.07    | -12.47                 | 350.6                                             | 124058.3 | 313.47   | 496233.2 |                   |
| Cabazitaxel                | 183133-96-2 | 835.9         | 182        | 4.31                       |                   | 4.31 | 2.24  | 7.56    | -5.29                  | 6.08                                              | 44.054   | 0.0024   | 167.19   |                   |

|              |            |       |        |      |      |      |       |      |        |      |         |        |       |  |
|--------------|------------|-------|--------|------|------|------|-------|------|--------|------|---------|--------|-------|--|
| Lamotrigine  | 84057-84-1 | 256.0 | 189.21 | 0.99 | 2.57 | 1.19 | -0.19 | 2.57 | -9.04  | 3127 | 10675.2 | 17.92  | 39424 |  |
| Mifepristone | 84371-65-3 | 429.6 | 230.23 | 5.39 |      | 5.05 | 4.70  | 5.39 | -10.69 | 33   | 33.42   | 0.0498 | 91.93 |  |

Data from ChemSpider and U.S. EPA Chemistry Dashboard.

**Table S5. Clinical *in vivo* PK-PD models for QTc prolongation.**

| Drug treatment                                                                   | Free fraction in plasma [1] | Free fraction in media [1] | In Vivo Model Type[2] | QTc0 (msec) | Other parameters[3]              | Cmax (uM Free) | Reference |
|----------------------------------------------------------------------------------|-----------------------------|----------------------------|-----------------------|-------------|----------------------------------|----------------|-----------|
| <b><i>Positive for clinical QTc prolongation in “healthy” population</i></b>     |                             |                            |                       |             |                                  |                |           |
| Cisapride                                                                        | 0.072                       | 0.616                      | Linear                | 386         | Slope = 1260                     | 0.067          | (20)      |
| Citalopram hydrobromide                                                          | 0.773                       | 1.000                      | Linear                | 425         | Slope = 16.8                     | 4.3            | (21)      |
| Disopyramide phosphate                                                           | 0.671                       | 0.954                      | Linear                | 450         | Slope = 15.0                     | 3.2            | (22)      |
|                                                                                  |                             |                            | Hill                  | 450         | Emax = 97.4; n = 1; Kd = 2.69    | 8.8            | (23)      |
| Dofetilide                                                                       | 0.622                       | 0.864                      | Hill                  | 368         | Emax = 131; n = 2.9; Kd = 0.0031 | 0.0085         | (24)      |
| Moxifloxacin hydrochloride                                                       | 1.000                       | 0.934                      | Linear                | 396         | Slope = 1.61                     | 4.4            | (25)      |
| N-acetyl procainamide                                                            | 0.978                       | 0.965                      | Linear                | 440         | Slope = 0.770                    | 112            | (26)      |
|                                                                                  |                             |                            | Hill                  | 440         | Emax = 170; n = 1; Kd = 28.5     | 112            |           |
| Quinidine sulfate                                                                | 0.375                       | 0.675                      | Linear                | 407         | Slope = 199                      | 3.8            | (27)      |
| Sematilide                                                                       | 0.847                       | 0.955                      | Linear                | 394         | Slope = 44.3                     | 2.6            | (11)      |
|                                                                                  |                             |                            | Hill                  | 394         | Emax = 90.5; n = 1; Kd = 1.22    | 2.6            |           |
| Sotalol                                                                          | 0.920                       | 0.968                      | Linear                | 380         | Slope = 6.51                     | 3.1            | (25)      |
| Vernacalant                                                                      | 0.788                       | 0.966                      | Hill                  | 424         | Emax = 20.3; n = 1; Kd = 5.14    | 15             | (28)      |
| <b><i>Negative for clinical QTc prolongation in “healthy” population [4]</i></b> |                             |                            |                       |             |                                  |                |           |
| Cabazitaxel                                                                      | 0.204                       | 0.705                      | Linear                | 400         | Slope = 0                        | 0.44           | (29)      |
| Lamotrigine                                                                      | 0.872                       | 1.000                      | Linear                | 400         | Slope = 0                        | 48             | (30)      |
| Mifepristone                                                                     | 0.017                       | 0.583                      | Linear                | 400         | Slope = 0                        | 0.24           | (31)      |

[1]See Main Text Table 1. Measured values >1 were set to 1.

[2]Model formulas: linear ( $QTc = QTc0 + Slope \times C_{free}$ ) and Hill ( $QTc = QTc0 + Emax \times C_{free}^n / (Kd^n + C_{free}^n)$ )

[3]Units of other model parameters: Slope (msec/uM free), Emax (msec), Kd (uM free)

[4]Slope set to zero for negative controls

## SUPPLEMENTAL REFERENCES

- (1) Carpenter, B. *et al.* Stan: A Probabilistic Programming Language. *J Stat Softw* **76**, 1-32 (2017).
- (2) U.S.FDA. FDA approval package: Cisapride monohydrate. (ed. Research, C.f.D.E.a.) 7 (2000).
- (3) U.S.FDA. FDA approval package: Biopharmaceutical review: Cisapride. (ed. Biopharmaceutics, D.o.) A17 (1992).
- (4) U.S.FDA. FDA package: Citalopram hydrobromide. 3 (2009).
- (5) U.S.FDA. FDA approval package: Disopyramide phosphate. 15 (1982).
- (6) U.S.FDA. FDA approval package: Biopharmaceutical review: Dofetilide Vol. 1.28 127 (1998).
- (7) U.S.FDA. FDA approval package: Moxifloxacin hydrochloride. 4 (2009).
- (8) Valkó, K.L., Nunhuck, S.B. & Hill, A.P. Estimating Unbound Volume of Distribution and Tissue Binding by In Vitro HPLC-Based Human Serum Albumin and Immobilised Artificial Membrane-Binding Measurements. *Journal of Pharmaceutical Sciences* **100**, 849-62 (2011).
- (9) U.S.FDA. FDA approval package: Quinidine sulfate. (ed. Research, C.f.D.E.a.) 12 (1989).
- (10) U.S.FDA. FDA approval package: Quinidine sulfate. 1 (2000).
- (11) Shi, J., Lasser, T., Koziol, T. & Hinderling, P.H. Kinetics and dynamics of sematilide. *Ther Drug Monit* **17**, 437-44 (1995).
- (12) U.S.FDA. FDA approval package: Sotalol hydrochloride. 3 (1992).
- (13) EMEA. Assessment report: Vernakalant. (ed. Agency, E.M.) 15 (2011).
- (14) Azaro, A. *et al.* A phase I pharmacokinetic and safety study of cabazitaxel in adult cancer patients with normal and impaired renal function. *Cancer Chemotherapy and Pharmacology* **78**, 1185-97 (2016).
- (15) Sarantopoulos, J. *et al.* Safety and pharmacokinetics of cabazitaxel in patients with hepatic impairment: a phase I dose-escalation study. *Cancer Chemotherapy and Pharmacology* **79**, 339-51 (2017).
- (16) Patsalos, P.N., Zugman, M., Lake, C., James, A., Ratnaraj, N. & Sander, J.W. Serum protein binding of 25 antiepileptic drugs in a routine clinical setting: A comparison of free non-protein-bound concentrations. *Epilepsia* **58**, 1234-43 (2017).
- (17) U.S.FDA. FDA approval package: Mifepristone (ed. Research, C.f.D.E.a.) 11 (2016).
- (18) U.S.FDA. FDA approval package: Mifepristone. 7 (2012).
- (19) Armitage, J.M., Wania, F. & Arnot, J.A. Application of mass balance models and the chemical activity concept to facilitate the use of in vitro toxicity data for risk assessment. *Environ Sci Technol* **48**, 9770-9 (2014).
- (20) Chain, A.S., Dubois, V.F., Danhof, M., Sturkenboom, M.C. & Della Pasqua, O. Identifying the translational gap in the evaluation of drug-induced QTc interval prolongation. *British journal of clinical pharmacology* **76**, 708-24 (2013).
- (21) Friberg, L.E., Isbister, G.K. & Duffull, S.B. Pharmacokinetic-pharmacodynamic modelling of QT interval prolongation following citalopram overdoses. *British journal of clinical pharmacology* **61**, 177-90 (2006).
- (22) Thibonnier, M., Holford, N.H., Upton, R.A., Blume, C.D. & Williams, R.L. Pharmacokinetic-pharmacodynamic analysis of unbound disopyramide directly measured

- in serial plasma samples in man. *Journal of pharmacokinetics and biopharmaceutics* **12**, 559-73 (1984).
- (23) Lima, J.J. & Boudoulas, H. Stereoselective effects of disopyramide enantiomers in humans. *Journal of cardiovascular pharmacology* **9**, 594-600 (1987).
- (24) Le Coz, F., Funck-Brentano, C., Morell, T., Ghadanfar, M.M. & Jaillon, P. Pharmacokinetic and pharmacodynamic modeling of the effects of oral and intravenous administrations of dofetilide on ventricular repolarization. *Clin Pharmacol Ther* **57**, 533-42 (1995).
- (25) Chain, A.S., Krudys, K.M., Danhof, M. & Della Pasqua, O. Assessing the probability of drug-induced QTc-interval prolongation during clinical drug development. *Clin Pharmacol Ther* **90**, 867-75 (2011).
- (26) Piergies, A.A., Ruo, T.I., Jansyn, E.M., Belknap, S.M. & Atkinson, A.J., Jr. Effect kinetics of N-acetylprocainamide-induced QT interval prolongation. *Clin Pharmacol Ther* **42**, 107-12 (1987).
- (27) Karbwang, J., Davis, T.M., Looareesuwan, S., Molunto, P., Bunnag, D. & White, N.J. A comparison of the pharmacokinetic and pharmacodynamic properties of quinine and quinidine in healthy Thai males. *British journal of clinical pharmacology* **35**, 265-71 (1993).
- (28) Mao, Z., Wheeler, J.J., Townsend, R., Gao, Y., Kshirsagar, S. & Keirns, J.J. Population pharmacokinetic-pharmacodynamic analysis of vernakalant hydrochloride injection (RSD1235) in atrial fibrillation or atrial flutter. *J Pharmacokinet Pharmacodyn* **38**, 541-62 (2011).
- (29) Maison-Blanche, P. *et al.* An open-label study to investigate the cardiac safety profile of cabazitaxel in patients with advanced solid tumors. *Cancer chemotherapy and pharmacology* **73**, 1241-52 (2014).
- (30) Dixon, R. *et al.* Lamotrigine does not prolong QTc in a thorough QT/QTc study in healthy subjects. *British journal of clinical pharmacology* **66**, 396-404 (2008).
- (31) Darpo, B., Bullingham, R., Combs, D.L., Ferber, G. & Hafez, K. Assessment of the cardiac safety and pharmacokinetics of a short course, twice daily dose of orally-administered mifepristone in healthy male subjects. *Cardiology journal* **20**, 152-60 (2013).
